# Supplementary material
Source: PubMed Central journal article supplement (PMC7927801)
Supplement: AAC.01118-20-s0001.pdf [file AAC.01118-20-s0001.pdf]

## Supplementary data

**Table S1:** *E. coli* ST457 collection metadata. The first part of the table contains data about our strains, the second part contains metadata of EnteroBase strains. Strains sequenced with PacBio are highlighted in bold and accession numbers to obtained chromosomal sequence are 1517k (SAMN11130353), CE1628 (SAMN14966947), CE1803 (SAMN14966948). The background colours divide strains into clades - H25 North (red), H16 (orange), H6 (turquoise), H45 (purple), H25 South (blue), MC1 (light gray), MC2 (dark gray). The ID of EnteroBase strains is based on the name of Assembly barcode of downloaded fasta files and the original form of ESC\_XX0000AA\_AS is simplified into XX0000 form.

| Strain ID | GenBank BioSample | Source   | Source Details  | Collection Year | Country   | Location        | Media (mg/L) |
|-----------|-------------------|----------|-----------------|-----------------|-----------|-----------------|--------------|
| 1508e     | SAMN14840864      | Poultry  | Cloacal samples | 2012            | Paraguay  | Lague           | CEF 2        |
| 1514k     | SAMN11130350      | Poultry  | Cloacal samples | 2012            | Paraguay  | Villeta         | COL 3.5      |
| 1515e     | SAMN10698928      | Poultry  | Cloacal samples | 2012            | Paraguay  | Villeta         | CEF 2        |
| 1515k     | SAMN11130351      | Poultry  | Cloacal samples | 2012            | Paraguay  | Villeta         | COL 3.5      |
| 1516e     | SAMN11130341      | Poultry  | Cloacal samples | 2012            | Paraguay  | Villeta         | CEF 2        |
| 1516k     | SAMN11130352      | Poultry  | Cloacal samples | 2012            | Paraguay  | Villeta         | COL 3.5      |
| 1517e     | SAMN11130342      | Poultry  | Cloacal samples | 2012            | Paraguay  | Villeta         | CEF 2        |
| 1517k     | SAMN11130353      | Poultry  | Cloacal samples | 2012            | Paraguay  | Villeta         | COL 3.5      |
| 1519e     | SAMN14840960      | Poultry  | Cloacal samples | 2012            | Paraguay  | Villeta         | CEF 2        |
| 1521e     | SAMN11130343      | Poultry  | Cloacal samples | 2012            | Paraguay  | Villeta         | CEF 2        |
| 1521k     | SAMN11130357      | Poultry  | Cloacal samples | 2012            | Paraguay  | Villeta         | COL 3.5      |
| 1523e     | SAMN11130345      | Poultry  | Cloacal samples | 2012            | Paraguay  | Nueva Italia    | CEF 2        |
| 1527e     | SAMN11130347      | Poultry  | Cloacal samples | 2012            | Paraguay  | Nueva Italia    | CEF 2        |
| 1527k     | SAMN11130363      | Poultry  | Cloacal samples | 2012            | Paraguay  | Nueva Italia    | COL 3.5      |
| EC0125    | SAMN14931112      | Clinical | UTI             | 2012            | Australia | Wollongong      | -            |
| EC0382    | SAMN14931113      | Clinical | Unspecified     | 2012            | Australia | SGH Sydney      | -            |
| CE1803A   | SAMN14841025      | Galls    | Cloacal samples | 2012            | Australia | Five Islands    | CEF 2        |
| CE1636    | SAMN14841026      | Galls    | Cloacal samples | 2012            | Australia | Five Islands    | CEF 2        |
| CE1564    | SAMN14841027      | Galls    | Cloacal samples | 2012            | Australia | Five Islands    | CEF 2        |
| CE1573    | SAMN14841028      | Galls    | Cloacal samples | 2012            | Australia | Five Islands    | CEF 2        |
| CE1600    | SAMN14841029      | Galls    | Cloacal samples | 2012            | Australia | Five Islands    | CEF 2        |
| CE1638    | SAMN14841030      | Galls    | Cloacal samples | 2012            | Australia | Five Islands    | CEF 2        |
| CE1590    | SAMN14841031      | Galls    | Cloacal samples | 2012            | Australia | Five Islands    | CEF 2        |
| CE1567    | SAMN14841032      | Galls    | Cloacal samples | 2012            | Australia | Five Islands    | CEF 2        |
| CE1628    | SAMN14841033      | Galls    | Cloacal samples | 2012            | Australia | Five Islands    | CEF 2        |
| CE1634    | SAMN14841034      | Galls    | Cloacal samples | 2012            | Australia | Five Islands    | CEF 2        |
| CE1619    | SAMN14841035      | Galls    | Cloacal samples | 2012            | Australia | Five Islands    | CEF 2        |
| CE1670    | SAMN14841036      | Galls    | Cloacal samples | 2012            | Australia | Five Islands    | CEF 2        |
| CE1715    | SAMN14841037      | Galls    | Cloacal samples | 2012            | Australia | Five Islands    | CEF 2        |
| CE1706    | SAMN14841038      | Galls    | Cloacal samples | 2012            | Australia | Five Islands    | CEF 2        |
| CE1683    | SAMN14841039      | Galls    | Cloacal samples | 2012            | Australia | Five Islands    | CEF 2        |
| CE1710    | SAMN14841040      | Galls    | Cloacal samples | 2012            | Australia | Five Islands    | CEF 2        |
| CE1731    | SAMN14841041      | Galls    | Cloacal samples | 2012            | Australia | Five Islands    | CEF 2        |
| CE1732A   | SAMN14841042      | Galls    | Cloacal samples | 2012            | Australia | Five Islands    | CEF 2        |
| CE1679    | SAMN14841043      | Galls    | Cloacal samples | 2012            | Australia | Five Islands    | CEF 2        |
| CE1994A   | SAMN14841044      | Galls    | Cloacal samples | 2012            | Australia | Montague Island | CEF 2        |
| CE1833    | SAMN14841045      | Galls    | Cloacal samples | 2012            | Australia | Sydney          | CEF 2        |
| CE1848    | SAMN14841046      | Galls    | Cloacal samples | 2012            | Australia | Sydney          | CEF 2        |
| CE1818    | SAMN14841047      | Galls    | Cloacal samples | 2012            | Australia | Sydney          | CEF 2        |
| CE1865    | SAMN14841048      | Galls    | Cloacal samples | 2012            | Australia | Sydney          | CEF 2        |
| CE1957    | SAMN14841049      | Galls    | Cloacal samples | 2012            | Australia | Montague Island | CEF 2        |
| CE2006    | SAMN14841050      | Galls    | Cloacal samples | 2012            | Australia | Montague Island | CEF 2        |
| CE1886    | SAMN14841051      | Galls    | Cloacal samples | 2012            | Australia | Sydney          | CEF 2        |
| CE1963    | SAMN14841052      | Galls    | Cloacal samples | 2012            | Australia | Montague Island | CEF 2        |
| CE1762    | SAMN14841053      | Galls    | Cloacal samples | 2012            | Australia | Sydney          | CEF 2        |
| CE1796    | SAMN14841054      | Galls    | Cloacal samples | 2012            | Australia | Sydney          | CEF 2        |
| CE1872    | SAMN14841055      | Galls    | Cloacal samples | 2012            | Australia | Sydney          | CEF 2        |
| CE1825    | SAMN14841056      | Galls    | Cloacal samples | 2012            | Australia | Sydney          | CEF 2        |
| CE1984    | SAMN14841057      | Galls    | Cloacal samples | 2012            | Australia | Montague Island | CEF 2        |
| CE1765    | SAMN14841058      | Galls    | Cloacal samples | 2012            | Australia | Sydney          | CEF 2        |
| CE1814    | SAMN14841059      | Galls    | Cloacal samples | 2012            | Australia | Sydney          | CEF 2        |
| CE1917    | SAMN14841060      | Galls    | Cloacal samples | 2012            | Australia | Montague Island | CEF 2        |
| CE2030    | SAMN14841061      | Galls    | Cloacal samples | 2012            | Australia | Montague Island | CEF 2        |
| CE2042    | SAMN14841062      | Galls    | Cloacal samples | 2012            | Australia | Montague Island | CEF 2        |
| CE1904    | SAMN14841063      | Galls    | Cloacal samples | 2012            | Australia | Montague Island | CEF 2        |
| CE1966    | SAMN14841064      | Galls    | Cloacal samples | 2012            | Australia | Montague Island | CEF 2        |
| CE1887    | SAMN14841065      | Galls    | Cloacal samples | 2012            | Australia | Sydney          | CEF 2        |
| CE2031A   | SAMN14841066      | Galls    | Cloacal samples | 2012            | Australia | Montague Island | CEF 2        |

| Strain ID | Enterobase ID         | Used source | Source Niche     | Source Type | Source Details                         | Year | Country        | Region          | City         |
|-----------|-----------------------|-------------|------------------|-------------|----------------------------------------|------|----------------|-----------------|--------------|
| BA3207    | AZ-TG60594            | Poultry     | Poultry          | Avian       | packaged whole turkey                  | 2013 | United States  | Arizona         | Flagstaff    |
| CB7000    | AG19-0248             | Canine      | Companion Animal | Canine      | Urine (Canis familiaris)               | 2019 | United States  | Ohio            |              |
| CB7211    | AUSMDU00026934        | Human       | Human            | Human       | Homo sapiens                           | 2014 | Australia      |                 |              |
| DB2140    | CVM N18EC1056         | Poultry     | Poultry          | Avian       | ground turkey                          | 2018 | United States  | Iowa            |              |
| DB2269    | CVM N18EC0492         | Poultry     | Poultry          | Avian       | Chicken Thighs                         | 2018 | United States  | South Dakota    |              |
| FB3603    | AUSMDU0008000         | Human       | Human            | Human       | Homo sapiens                           | 2017 | Australia      |                 |              |
| FB5883    | CN-593-D              | Human       | Human            | Human       |                                        | 2018 | China          | Shanghai        | Shanghai     |
| FB7536    | CN-441                | Human       | Human            | Human       |                                        | 2017 | China          | Shanghai        | Shanghai     |
| FB9087    | 19GA08CB32            | Poultry     | Poultry          | Avian       | Whole Chicken                          | 2019 | United States  | Georgia         |              |
| FB9797    | 16AR1251              | Human       | Human            | Human       | Homo sapiens                           | 2016 | New Zealand    |                 |              |
| GA0711    | AZ-TG-WCHI-2-2        | Water       | Environment      | Water       | Untreated wastewater                   | 2014 | United States  | Arizona         |              |
| GA8976    | MRSN388634            | Clinical    | Human            | Human       | Homo sapiens; Clinical                 | 2016 | United States  |                 |              |
| GA9192    | 200628                | Human       | Human            | Human       | Human; Homo sapiens                    | 2015 | United Kingdom |                 |              |
| GA9323    | 204427                | Human       | Human            | Human       | Human; Homo sapiens                    | 2016 | United Kingdom |                 |              |
| GA9368    | 209671                | Human       | Human            | Human       | Human; Homo sapiens                    | 2016 | United Kingdom |                 |              |
| GB0145    | P.2.2                 | Swine       | Livestock        | Swine       | Swine; Pork meat                       | 2019 | Brazil         | Paraná          | Londrina     |
| HA3078    | 452                   | Poultry     | Poultry          | Avian       |                                        | 2014 | China          | Shandong        |              |
| HA7607    | KOR019                | Water       | Environment      | Water       | river                                  |      | Japan          |                 |              |
| HA9232    | 1600430               | Bovine      | Livestock        | Bovine      | Faeces                                 | 2016 | Luxembourg     |                 |              |
| HA9243    | 1600431               | Bovine      | Livestock        | Bovine      | Faeces                                 | 2016 | Luxembourg     |                 |              |
| HA9247    | 1600759               | Bovine      | Livestock        | Bovine      | Faeces                                 | 2016 | Luxembourg     |                 |              |
| IA0789    | 9.1-R1                | Human       | Human            | Human       | Homo sapiens; human faeces             | 2008 | Australia      | New South Wales | Sydney       |
| IA1961    | B1700                 | Avian       | Human            | Human       | Dacelo novaeguineae; Faeces            | 2011 | Australia      | Queensland      |              |
| IA1962    | B093                  | Avian       | Wild Animal      | Air         | Strepera graculina; Faeces             | 2001 | Australia      | New South Wales |              |
| IA8721    | 14059134              |             |                  |             |                                        | 2014 | Italy          |                 |              |
| JA0103    | SCP20-70              | Human       | Human            | Human       | Homo sapiens                           |      | Netherlands    |                 |              |
| JA0175    | SCK33-56              | Human       | Human            | Human       | Homo sapiens                           |      | Netherlands    |                 |              |
| LA1332    | MOD1-EC3670           | Poultry     | Companion Animal | Air         | feces Young Turkey,Meleagris gallopavo | 2014 | United States  | South Carolina  |              |
| MA1963    | NC_STEC34             | Poultry     | Poultry          | Air         | Chicken Fecal House 1 Front            | 2014 | United States  | Tennessee       |              |
| MA3450    | FSISI710886           | Swine       | Livestock        | Swine       | animal-swine-market swine              | 2017 | United States  | Indiana         |              |
| OA0813    | EC-32                 | Artificial  | Companion Animal | Air         | artificial; artificial gut model       | 2015 | United Kingdom |                 |              |
| OA0815    | EC-34                 | Artificial  | Companion Animal | Air         | artificial; artificial gut model       | 2015 | United Kingdom |                 |              |
| OA1337    | ZTA15/00685EB1        | Swine       | Livestock        | Air         | Fattening pig caecal sample            | 2015 | Spain          |                 |              |
| PA1102    | MER-67                | Clinical    | Human            | Human       | Homo sapiens; Age: 85; female; Blood   | 2015 | Australia      | Queensland      | Brisbane     |
| PA1693    | 20151357              | Poultry     | Poultry          | Avian       | Chicken; Feeces                        |      | Vietnam        |                 |              |
| QA5299    | JML012                | Human       | Human            | Human       | feces; Homo sapiens                    | 2015 | Japan          |                 |              |
| QA5359    | JML078                | Human       | Human            | Human       | feces; Homo sapiens                    | 2015 | Japan          |                 |              |
| QA5364    | JML083                | Human       | Human            | Human       | feces; Homo sapiens                    | 2015 | Japan          |                 |              |
| QA6402    | 9-024                 | Human       | Human            | Human       | feces; Homo sapiens                    | 2009 | Japan          |                 |              |
| QA7284    | JML009                | Human       | Human            | Human       | feces; Homo sapiens                    | 2015 | Japan          |                 |              |
| QA7342    | JML100                | Human       | Human            | Human       | feces; Homo sapiens                    | 2015 | Japan          |                 |              |
| RA2549    | ARIMEC185-15          | Human       | Human            | Human       | stool; Homo sapiens                    | 2015 | Argentina      |                 |              |
| RA4251    | AC13136               | Human       |                  |             | Breeder                                | 2017 | Germany        |                 |              |
| RA5006    | 1034-14               | Human       | Human            | Human       | Homo sapiens; rectal swab              | 2014 | Germany        |                 |              |
| RA6708    | INF9716R2E            | Water       | Environment      | Water       | Water/Influent                         | 2016 | United States  | Colorado        |              |
| RA8202    | NR0631                | Human       | Human            | Human       | Homo sapiens; Rectal swab              | 2014 | United States  | New York        | New York     |
| RA8205    | 35153                 | Human       | Human            | Human       | Homo sapiens; stool                    | 2014 | United States  | New York        | New York     |
| RA8206    | 35140                 | Human       | Human            | Human       | Homo sapiens; stool                    | 2014 | United States  | New York        | New York     |
| RA8209    | 35114                 | Human       | Human            | Human       | Homo sapiens; stool                    | 2014 | United States  | New York        | New York     |
| SA0179    | PSU-0686              | Canine      | Companion Animal | Canine      | Dog, (Canine)                          | 2012 | United States  | New York        | New York     |
| SA4138    | 401636                | Human       | Human            | Human       | human; Homo sapiens                    | 2017 | United Kingdom |                 |              |
| SA4972    | EcIB36                | Human       | Human            | Human       |                                        | 2016 | Bolivia        | Cochabamba      | Villa Tunari |
| SA9872    | FSISI1811925          | Swine       | Livestock        | Swine       | animal-swine-market swine              | 2018 | United States  | Oklahoma        |              |
| TA7464    | 595625                |             |                  |             |                                        | 2018 | United Kingdom |                 |              |
| TA9995    | FSISI1814329          | Poultry     | Poultry          | Air         | animal-chicken-young chicken           | 2018 | United States  | Georgia         |              |
| VA4049    | 1028085               |             |                  |             |                                        | 2017 | Mexico         |                 |              |
| VA4091    | CO1                   | Human       | Human            |             |                                        | 2016 | Ecuador        | Pichincha       | Quito        |
| VA5574    | 14S03014-1            | Bovine      | Livestock        | Bovine      | bos taurus; feces                      | 2014 | Netherlands    |                 |              |
| VA5580    | 14S03029-1            | Bovine      | Livestock        | Bovine      | bos taurus; feces                      | 2014 | Netherlands    |                 |              |
| VA5582    | 14S03036-2            | Bovine      | Livestock        | Bovine      | bos taurus; feces                      | 2014 | Netherlands    |                 |              |
| VA5681    | 14S05071-2            | Bovine      | Livestock        | Bovine      | bos taurus; feces                      | 2014 | Netherlands    |                 |              |
| VA5694    | 15S00475-2            | Bovine      | Livestock        | Bovine      | bos taurus; feces                      | 2015 | Netherlands    |                 |              |
| VA5695    | 15S00482-2            | Bovine      | Livestock        | Bovine      | bos taurus; feces                      | 2015 | Netherlands    |                 |              |
| VA5961    | UPCH_214              | Human       | Human            | Human       |                                        | 2018 | Peru           |                 | Lima         |
| VA9753    | FSISI1917410          | Poultry     | Poultry          | Air         | Animal-Turkey-Young Turkey             | 2019 | United States  | Michigan        |              |
| VA9780    | ECOL-18-VL-SD-IA-0014 | Canine      | ND               | Canine      | Urine (Canine)                         | 2018 | United States  | Iowa            |              |
| WA4304    |                       |             |                  |             |                                        | 2012 | United States  |                 |              |
| WA4383    | 12HE8                 | Clinical    | Human            | Human       | Patient Blood; Homo sapiens            | 2012 | China          | Guangdong       |              |
| WA5506    | JIE4016               | Clinical    | Human            | Human       | Homo sapiens; urine                    | 2014 | Australia      | New South Wales | Sydney       |
| WA5530    | JIE3921               | Clinical    | Human            | Human       | Homo sapiens; urine                    | 2013 | Australia      | New South Wales | Sydney       |
| WA5541    | JIE3711               | Clinical    | Human            | Human       | Homo sapiens; urine                    | 2013 | Australia      | New South Wales | Sydney       |
| WA5546    | RP.A22                | Human       | Human            | Human       | Homo sapiens                           | 2009 | Australia      | New South Wales | Sydney       |
| WA5552    | SYD1232               | Human       | Human            | Human       | Homo sapiens                           | 2015 | Australia      | New South Wales | Sydney       |
| WA5591    | JIE4096               | Clinical    | Human            | Human       | Homo sapiens; urine                    | 2014 | Australia      | New South Wales | Sydney       |
| WA7300    | ERS2367440            | Food        | Food             | ND          | Human, Food                            | 2016 | Cambodia       |                 |              |
| WA7349    | ERS2367492            | Food        | Food             | ND          | Human, Food                            | 2016 | Cambodia       |                 |              |
| XA6422    | 12HE7                 | Clinical    | Human            | Human       | Patient Blood; Homo sapiens            | 2012 | China          | Unresolved      | Unresolved   |
| YA1066    | 14HE22                | Clinical    | Human            | Human       | Patient Blood; Homo sapiens            | 2014 | China          | Beijing         | Beijing      |
| ZA1576    | FSISI1920379          | Poultry     | Poultry          | Air         | Animal-Turkey-Young Turkey             | 2019 | United States  | Indiana         |              |
| ZA5550    | FSISI1921229          | Poultry     | Poultry          | Air         | Animal-Turkey-Young Turkey             | 2019 | United States  | Iowa            |              |



**Figure S1:** Phylogenetic analysis of *E. coli* ST457 and their characteristics

Five main clades are divided with colour - H16 (orange), H25 North (red), H6 (turquoise), H45 (purple) and H25 South (blue). Five strains are part of minor clades MC1 (BA3207 and WA4304) and MC2 (CB7000, DB2140, VA9780). The text columns contain name of the strain, country of isolation, year of isolation, source of isolation and serotype of the respected strain. The Australian Gull subset is distinguished with the text colour based on the location of the isolation: Montague island (green), Five Islands (purple) and Sydney (blue).

Pink squares indicate presence of virulence-associated genes (VAGs). All strains shared 27 VAGs: *chuSTUVWXY*, *entBCFS*, *espL1*, *fepABCD*, *fes*, *fimFGH*, *ompA* and *shuA* which are not part of the picture. The \* represents cluster of several VAGs which showed identical profile (*fim\** - *fimCDEI*; *gsp\** - *gspCDEFGHI*; *fyuA* *irp\** *ybt* - *irp1*, *irp2*, *fyuA*, *ybtAEPQSTU*; *iuc\** - *iucBCD*; *iro\** - *iroBCDEN*; *pap\** - *papCHJK*; *hly\** - *hlyABCD*; *agg\** *sat* - *aspU*, *aag3ABCD*, *sat*; *sfa\** - *sfaBCDGHY*, *cnf1*, *focCD*). In some strains, the gene identity for *gspFHIJLM* was below 95% threshold but > 90%. Invasion-associated protein *aslA* was truncated at the same position and half of it was detected within different contigs in four ST457 strains which formed a subclade within the H45 clade (98 - 182 SNPs among three of them, CE1706 > 1000 SNPs from others). As such *aslA* was expected to be non-functional in these four strains and marked as absent.

Purple squares represent detected resistance genes to antimicrobial and anticancer substances. Genes encoding resistance to beta-lactams (*bla*<sub>CMY-2</sub>, *bla*<sub>DHA-1</sub>, *bla*<sub>CTX-M-1;2,3;8;14;15;27;55;125</sub>, *bla*<sub>TEM-1;135</sub>, *bla*<sub>OXA-1;9</sub> – we excluded in strict *bla*<sub>EC</sub> detected in all strains), aminoglycosides (*aac(3)-IIa*, *aac(3)-IId*, *aac(3)-IVa*, *aac(3)-VIa*, *aac(6')-Ib*, *aac(6')-Ib4*, *aadA1*, *aadA2*, *aadA5*, *aph(3'')-Ib*, *aph(3')-IIa*, *aph(3')-Ia*, *aph(4)-Ia*, *armA*, *rmtB1*, *aac(6')-Ib-cr*), sulphonamides (*sul1*, *sul2*, *sul3*), tetracyclines [*tet(A)*, *tet(B)*, *tet(M)*, *tet(X)*], trimethoprim (*dfrA1*, *dfrA5*, *dfrA7*, *dfrA12*, *dfrA14*, *dfrA17*), amphenicols (*catA1*, *catA2*, *catB3*, *cmlA1*, *floR*), colistin (*mcr-*

*1.1.*, *mcr-2.1*, *mcr-5.1*), macrolides [*erm*(B), *mph*(A), *mph*(E), *msr*(E)], fosfomycine (*fosA3*, *forA4*), quinolones (*oqxAB*, *aac*(6')-*Ib-cr*, *qnrB4*, *qnrB19*), carbapenems (*bla*<sub>OXA-23</sub>, *bla*<sub>IMP-4</sub>, *bla*<sub>NDM-9</sub>), lincosamides [*lnu*(F)] and rifampin (*arr-3*). Genes encoding resistance to bleomycin (*ble*<sub>MBL</sub>, *bleO*, *bleTn5*) which is mostly used in cancer treatment were detected.

Turquoise squares indicate presence of plasmid replicons as they were detected using PlasmidFinder database.

**Table S2:** Single nucleotide polymorphisms (SNPs) count heat map matrix for strains of the five main clades in tables H45; H16; H25 North; H6; H25 South. The heat maps are created using red (low SNP distance) - blue (high SNP distance) scale. The strains are represented by name, country and a number in line part, only number of the respected strain is present in the column part.

| H45    | Country   |    | 1    | 2    | 3    | 4    | 5    | 6    | 7    | 8    | 9    | 10   | 11   | 12   | 13   | 14   |
|--------|-----------|----|------|------|------|------|------|------|------|------|------|------|------|------|------|------|
| GA0711 | USA       | 1  | 0    | 73   | 1322 | 662  | 655  | 80   | 1283 | 146  | 1318 | 691  | 1996 | 693  | 689  | 73   |
| IA0789 | Australia | 2  | 73   | 0    | 1304 | 642  | 635  | 73   | 1265 | 139  | 1299 | 673  | 1976 | 673  | 670  | 66   |
| IA1962 | Australia | 3  | 1322 | 1304 | 0    | 777  | 771  | 1322 | 150  | 1388 | 182  | 809  | 1404 | 808  | 805  | 1316 |
| IA8721 | Italy     | 4  | 662  | 642  | 777  | 0    | 97   | 661  | 739  | 727  | 773  | 131  | 1993 | 119  | 116  | 654  |
| QA6402 | Japan     | 5  | 655  | 635  | 771  | 97   | 0    | 654  | 732  | 719  | 766  | 91   | 1986 | 92   | 89   | 647  |
| WA5506 | Australia | 6  | 80   | 73   | 1322 | 661  | 654  | 0    | 1284 | 94   | 1318 | 691  | 1995 | 692  | 689  | 21   |
| WA5530 | Australia | 7  | 1283 | 1265 | 150  | 739  | 732  | 1284 | 0    | 1296 | 98   | 770  | 1364 | 769  | 766  | 1277 |
| WA5541 | Australia | 8  | 146  | 139  | 1388 | 727  | 719  | 94   | 1296 | 0    | 1280 | 703  | 2061 | 758  | 701  | 33   |
| WA5552 | Australia | 9  | 1318 | 1299 | 182  | 773  | 766  | 1318 | 98   | 1280 | 0    | 758  | 1390 | 804  | 755  | 1265 |
| CE1567 | Australia | 10 | 691  | 673  | 809  | 131  | 91   | 691  | 770  | 703  | 758  | 0    | 2024 | 96   | 93   | 684  |
| CE1706 | Australia | 11 | 1996 | 1976 | 1404 | 1993 | 1986 | 1995 | 1364 | 2061 | 1390 | 2024 | 0    | 2024 | 2021 | 1988 |
| CE1886 | Australia | 12 | 693  | 673  | 808  | 119  | 92   | 692  | 769  | 758  | 804  | 96   | 2024 | 0    | 15   | 685  |
| CE1825 | Australia | 13 | 689  | 670  | 805  | 116  | 89   | 689  | 766  | 701  | 755  | 93   | 2021 | 15   | 0    | 682  |
| CE1765 | Australia | 14 | 73   | 66   | 1316 | 654  | 647  | 21   | 1277 | 33   | 1265 | 684  | 1988 | 685  | 682  | 0    |

| H16    | Country     |   | 1    | 2    | 3    | 4    | 5    | 6    | 7    |
|--------|-------------|---|------|------|------|------|------|------|------|
| CB7211 | Australia   | 1 | 0    | 3690 | 3692 | 3693 | 3717 | 3716 | 3743 |
| VA5574 | Netherlands | 2 | 3690 | 0    | 6    | 3    | 45   | 42   | 69   |
| VA5580 | Netherlands | 3 | 3692 | 6    | 0    | 9    | 47   | 44   | 71   |
| VA5582 | Netherlands | 4 | 3693 | 3    | 9    | 0    | 48   | 45   | 72   |
| VA5681 | Netherlands | 5 | 3717 | 45   | 47   | 48   | 0    | 3    | 30   |
| VA5694 | Netherlands | 6 | 3716 | 42   | 44   | 45   | 3    | 0    | 27   |
| VA5695 | Netherlands | 7 | 3743 | 69   | 71   | 72   | 30   | 27   | 0    |



| H25 North | Country    |    | 1    | 2    | 3    | 4    | 5    | 6    | 7    | 8    | 9    | 10   | 11   | 12   | 13   | 14   | 15   | 16   | 17   | 18   | 19   | 20   | 21   | 22   | 23   | 24   | 25   | 26   | 27   | 28   |
|-----------|------------|----|------|------|------|------|------|------|------|------|------|------|------|------|------|------|------|------|------|------|------|------|------|------|------|------|------|------|------|------|
| FB3603    | Australia  | 1  | 0    | 1160 | 3070 | 1728 | 1164 | 7135 | 1748 | 1749 | 1749 | 1355 | 1767 | 1306 | 457  | 90   | 92   | 92   | 92   | 91   | 765  | 1393 | 92   | 1291 | 788  | 2918 | 1810 | 87   | 2918 | 1345 |
| FB5883    | China      | 2  | 1160 | 0    | 2561 | 1219 | 46   | 6627 | 1241 | 1242 | 1242 | 1152 | 1260 | 1103 | 1070 | 1164 | 1166 | 1166 | 1166 | 1165 | 1151 | 1190 | 1165 | 1387 | 884  | 2409 | 1303 | 1161 | 2409 | 1142 |
| FB7536    | China      | 3  | 3070 | 2561 | 0    | 1482 | 2565 | 5916 | 1509 | 1510 | 1510 | 2387 | 1528 | 2339 | 2979 | 3070 | 3072 | 3072 | 3072 | 3071 | 2723 | 2426 | 3072 | 2339 | 2430 | 1397 | 1698 | 3067 | 1397 | 2378 |
| GA8976    | USA        | 4  | 1728 | 1219 | 1482 | 0    | 1223 | 5778 | 111  | 112  | 112  | 1052 | 130  | 999  | 1639 | 1724 | 1726 | 1726 | 1726 | 1725 | 1594 | 1090 | 1726 | 1589 | 1088 | 1330 | 367  | 1721 | 1330 | 1038 |
| GB0145    | Brazil     | 5  | 1164 | 46   | 2565 | 1223 | 0    | 6631 | 1245 | 1246 | 1246 | 1156 | 1264 | 1107 | 1074 | 1168 | 1170 | 1170 | 1170 | 1169 | 1157 | 1194 | 1170 | 1391 | 888  | 2413 | 1307 | 1165 | 2413 | 1146 |
| HA3078    | China      | 6  | 7135 | 6627 | 5916 | 5778 | 6631 | 0    | 5778 | 5779 | 5779 | 6477 | 5797 | 6424 | 7047 | 7136 | 7138 | 7138 | 7138 | 7136 | 6648 | 6515 | 7137 | 6536 | 6495 | 6289 | 5855 | 7133 | 6289 | 6463 |
| HA9232    | Luxembourg | 7  | 1748 | 1241 | 1509 | 111  | 1245 | 5778 | 0    | 1    | 1    | 1045 | 55   | 996  | 1659 | 1742 | 1744 | 1743 | 1744 | 1743 | 1615 | 1083 | 1744 | 1611 | 1108 | 1357 | 383  | 1739 | 1357 | 1035 |
| HA9243    | Luxembourg | 8  | 1749 | 1242 | 1510 | 112  | 1246 | 5779 | 1    | 0    | 2    | 1046 | 56   | 997  | 1660 | 1743 | 1745 | 1744 | 1745 | 1744 | 1616 | 1084 | 1745 | 1612 | 1109 | 1358 | 384  | 1740 | 1358 | 1036 |
| HA9247    | Luxembourg | 9  | 1749 | 1242 | 1510 | 112  | 1246 | 5779 | 1    | 2    | 0    | 1046 | 56   | 997  | 1656 | 1743 | 1745 | 1745 | 1745 | 1744 | 1616 | 1084 | 1745 | 1612 | 1109 | 1358 | 384  | 1740 | 1358 | 1036 |
| MA3450    | USA        | 10 | 1355 | 1152 | 2387 | 1052 | 1156 | 6477 | 1045 | 1046 | 1046 | 0    | 1064 | 79   | 1254 | 1361 | 1363 | 1362 | 1363 | 1362 | 1235 | 88   | 1363 | 1180 | 678  | 2236 | 1164 | 1357 | 2236 | 122  |
| OA1337    | Spain      | 11 | 1767 | 1260 | 1528 | 130  | 1264 | 5797 | 55   | 56   | 56   | 1064 | 0    | 1015 | 1678 | 1761 | 1763 | 1763 | 1763 | 1762 | 1634 | 1102 | 1763 | 1630 | 1127 | 1376 | 402  | 1758 | 1376 | 1054 |
| PA1693    | Vietnam    | 12 | 1306 | 1103 | 2339 | 999  | 1107 | 6424 | 996  | 997  | 997  | 79   | 1015 | 0    | 1218 | 1312 | 1314 | 1314 | 1314 | 1313 | 1187 | 117  | 1314 | 1154 | 652  | 2187 | 1116 | 1309 | 2187 | 69   |
| QA7342    | Japan      | 13 | 457  | 1070 | 2979 | 1639 | 1074 | 7047 | 1659 | 1660 | 1656 | 1254 | 1678 | 1218 | 0    | 465  | 467  | 466  | 467  | 467  | 784  | 1292 | 468  | 1180 | 699  | 2828 | 1719 | 462  | 2828 | 1256 |
| RA8202    | USA        | 14 | 90   | 1164 | 3070 | 1724 | 1168 | 7136 | 1742 | 1743 | 1743 | 1361 | 1761 | 1312 | 465  | 0    | 2    | 2    | 2    | 41   | 774  | 1399 | 42   | 1297 | 794  | 2918 | 1816 | 39   | 2918 | 1351 |
| RA8205    | USA        | 15 | 92   | 1166 | 3072 | 1726 | 1170 | 7138 | 1744 | 1745 | 1745 | 1363 | 1763 | 1314 | 467  | 2    | 0    | 4    | 2    | 43   | 776  | 1401 | 44   | 1299 | 796  | 2920 | 1818 | 41   | 2920 | 1353 |
| RA8206    | USA        | 16 | 92   | 1166 | 3072 | 1726 | 1170 | 7138 | 1743 | 1744 | 1745 | 1362 | 1763 | 1314 | 466  | 2    | 4    | 0    | 4    | 43   | 776  | 1400 | 44   | 1297 | 795  | 2920 | 1818 | 41   | 2920 | 1353 |
| RA8209    | USA        | 17 | 92   | 1166 | 3072 | 1726 | 1170 | 7138 | 1744 | 1745 | 1745 | 1363 | 1763 | 1314 | 467  | 2    | 2    | 4    | 0    | 43   | 776  | 1401 | 44   | 1299 | 796  | 2920 | 1818 | 41   | 2920 | 1353 |
| SA4138    | UK         | 18 | 91   | 1165 | 3071 | 1725 | 1169 | 7136 | 1743 | 1744 | 1744 | 1362 | 1762 | 1313 | 467  | 41   | 43   | 43   | 43   | 0    | 774  | 1400 | 1    | 1298 | 795  | 2919 | 1817 | 40   | 2919 | 1352 |
| SA4972    | Bolivia    | 19 | 765  | 1151 | 2723 | 1594 | 1157 | 6648 | 1615 | 1616 | 1616 | 1235 | 1634 | 1187 | 784  | 774  | 776  | 776  | 776  | 774  | 0    | 1273 | 775  | 1068 | 669  | 2585 | 1676 | 770  | 2585 | 1229 |
| SA9872    | USA        | 20 | 1393 | 1190 | 2426 | 1090 | 1194 | 6515 | 1083 | 1084 | 1084 | 88   | 1102 | 117  | 1292 | 1399 | 1401 | 1400 | 1401 | 1400 | 1273 | 0    | 1401 | 1218 | 716  | 2274 | 1202 | 1395 | 2274 | 160  |
| TA7464    | UK         | 21 | 92   | 1165 | 3072 | 1726 | 1170 | 7137 | 1744 | 1745 | 1745 | 1363 | 1763 | 1314 | 468  | 42   | 44   | 44   | 44   | 1    | 775  | 1401 | 0    | 1299 | 759  | 2920 | 1818 | 41   | 2920 | 1353 |
| VA4049    | Mexico     | 22 | 1291 | 1387 | 2339 | 1589 | 1391 | 6536 | 1611 | 1612 | 1612 | 1180 | 1630 | 1154 | 1180 | 1297 | 1299 | 1297 | 1299 | 1298 | 1068 | 1218 | 1299 | 0    | 604  | 2085 | 1672 | 1292 | 2085 | 1198 |
| VA4091    | Ecuador    | 23 | 788  | 884  | 2430 | 1088 | 888  | 6495 | 1108 | 1109 | 1109 | 678  | 1127 | 652  | 699  | 794  | 796  | 795  | 796  | 795  | 669  | 716  | 759  | 604  | 0    | 2278 | 1170 | 791  | 2278 | 695  |
| WA4383    | China      | 24 | 2918 | 2409 | 1397 | 1330 | 2413 | 6289 | 1357 | 1358 | 1358 | 2236 | 1376 | 2187 | 2828 | 2918 | 2920 | 2920 | 2920 | 2919 | 2585 | 2274 | 2920 | 2085 | 2278 | 0    | 1546 | 2915 | 0    | 2226 |
| WA7300    | Cambodia   | 25 | 1810 | 1303 | 1698 | 367  | 1307 | 5855 | 383  | 384  | 384  | 1164 | 402  | 1116 | 1719 | 1816 | 1818 | 1818 | 1818 | 1817 | 1676 | 1202 | 1818 | 1672 | 1170 | 1546 | 0    | 1813 | 1546 | 1155 |
| WA7349    | Cambodia   | 26 | 87   | 1161 | 3067 | 1721 | 1165 | 7133 | 1739 | 1740 | 1740 | 1357 | 1758 | 1309 | 462  | 39   | 41   | 41   | 41   | 40   | 770  | 1395 | 41   | 1292 | 791  | 2915 | 1813 | 0    | 2915 | 1348 |
| XA6422    | China      | 27 | 2918 | 2409 | 1397 | 1330 | 2413 | 6289 | 1357 | 1358 | 1358 | 2236 | 1376 | 2187 | 2828 | 2918 | 2920 | 2920 | 2920 | 2919 | 2585 | 2274 | 2920 | 2085 | 2278 | 0    | 1546 | 2915 | 0    | 2226 |
| YA1066    | China      | 28 | 1345 | 1142 | 2378 | 1038 | 1146 | 6463 | 1035 | 1036 | 1036 | 122  | 1054 | 69   | 1256 | 1351 | 1353 | 1353 | 1353 | 1352 | 1229 | 160  | 1353 | 1198 | 695  | 2226 | 1155 | 1348 | 2226 | 0    |

| H6     | Country  |    | 1    | 2    | 3    | 4    | 5    | 6    | 7    | 8    | 9    | 10   | 11   | 12   | 13   | 14   | 15   | 16   | 17   | 18   | 19   | 20   | 21   | 22   | 23   | 24   | 25   | 26   | 27   | 28   | 29   |
|--------|----------|----|------|------|------|------|------|------|------|------|------|------|------|------|------|------|------|------|------|------|------|------|------|------|------|------|------|------|------|------|------|
| 1508e  | Paraguay | 1  | 0    | 51   | 49   | 48   | 49   | 48   | 98   | 47   | 48   | 47   | 48   | 53   | 48   | 78   | 147  | 176  | 2059 | 135  | 242  | 235  | 1073 | 177  | 216  | 131  | 166  | 1098 | 177  | 2407 | 159  |
| 1514k  | Paraguay | 2  | 51   | 0    | 8    | 3    | 4    | 3    | 81   | 6    | 3    | 6    | 7    | 53   | 7    | 57   | 126  | 155  | 2011 | 114  | 221  | 214  | 1052 | 156  | 216  | 110  | 169  | 1077 | 157  | 2383 | 138  |
| 1515e  | Paraguay | 3  | 49   | 8    | 0    | 5    | 6    | 5    | 83   | 4    | 5    | 4    | 5    | 56   | 5    | 55   | 124  | 153  | 2009 | 112  | 219  | 212  | 1050 | 154  | 214  | 108  | 167  | 1075 | 154  | 2373 | 136  |
| 1515k  | Paraguay | 4  | 48   | 3    | 5    | 0    | 1    | 0    | 78   | 3    | 0    | 3    | 4    | 51   | 4    | 54   | 123  | 152  | 2008 | 111  | 218  | 211  | 1049 | 153  | 213  | 107  | 166  | 1074 | 154  | 2380 | 135  |
| 1516e  | Paraguay | 5  | 49   | 4    | 6    | 1    | 0    | 1    | 79   | 4    | 1    | 4    | 5    | 52   | 5    | 55   | 124  | 153  | 2009 | 112  | 219  | 212  | 1050 | 154  | 214  | 108  | 167  | 1075 | 155  | 2381 | 136  |
| 1516k  | Paraguay | 6  | 48   | 3    | 5    | 0    | 1    | 0    | 78   | 3    | 0    | 3    | 4    | 51   | 4    | 54   | 123  | 152  | 2008 | 111  | 218  | 211  | 1049 | 153  | 213  | 107  | 166  | 1074 | 154  | 2380 | 135  |
| 1517e  | Paraguay | 7  | 98   | 81   | 83   | 78   | 79   | 78   | 0    | 81   | 78   | 81   | 82   | 129  | 82   | 112  | 201  | 230  | 2086 | 189  | 296  | 289  | 1127 | 231  | 288  | 185  | 244  | 1152 | 228  | 2457 | 213  |
| 1517k  | Paraguay | 8  | 47   | 6    | 4    | 3    | 4    | 3    | 81   | 0    | 3    | 2    | 3    | 54   | 3    | 53   | 122  | 151  | 2007 | 110  | 217  | 210  | 1048 | 152  | 212  | 106  | 165  | 1073 | 153  | 2379 | 134  |
| 1519e  | Paraguay | 9  | 48   | 3    | 5    | 0    | 1    | 0    | 78   | 3    | 0    | 3    | 4    | 51   | 4    | 54   | 123  | 152  | 2008 | 111  | 218  | 211  | 1049 | 153  | 213  | 107  | 166  | 1074 | 154  | 2380 | 135  |
| 1521e  | Paraguay | 10 | 47   | 6    | 4    | 3    | 4    | 3    | 81   | 2    | 3    | 0    | 1    | 54   | 3    | 53   | 122  | 151  | 2007 | 110  | 217  | 210  | 1048 | 152  | 212  | 106  | 165  | 1073 | 153  | 2379 | 134  |
| 1521k  | Paraguay | 11 | 48   | 7    | 5    | 4    | 5    | 4    | 82   | 3    | 4    | 1    | 0    | 55   | 4    | 54   | 123  | 152  | 2008 | 111  | 218  | 211  | 1049 | 153  | 213  | 107  | 166  | 1074 | 154  | 2379 | 135  |
| 1523e  | Paraguay | 12 | 53   | 53   | 56   | 51   | 52   | 51   | 129  | 54   | 51   | 54   | 55   | 0    | 55   | 100  | 174  | 203  | 2059 | 162  | 269  | 262  | 1100 | 199  | 218  | 158  | 217  | 1079 | 205  | 2426 | 186  |
| 1527e  | Paraguay | 13 | 48   | 7    | 5    | 4    | 5    | 4    | 82   | 3    | 4    | 3    | 4    | 55   | 0    | 52   | 123  | 152  | 2008 | 111  | 218  | 211  | 1049 | 153  | 213  | 107  | 166  | 1073 | 154  | 2380 | 135  |
| 1527k  | Paraguay | 14 | 78   | 57   | 55   | 54   | 55   | 54   | 112  | 53   | 54   | 53   | 54   | 100  | 52   | 0    | 173  | 202  | 2058 | 161  | 268  | 261  | 1099 | 203  | 263  | 157  | 216  | 1124 | 204  | 2429 | 185  |
| DB2269 | USA      | 15 | 147  | 126  | 124  | 123  | 124  | 123  | 201  | 122  | 123  | 122  | 123  | 174  | 123  | 173  | 0    | 157  | 2040 | 24   | 199  | 191  | 1070 | 158  | 218  | 114  | 83   | 1094 | 175  | 2412 | 116  |
| HA7607 | Japan    | 16 | 176  | 155  | 153  | 152  | 153  | 152  | 230  | 151  | 152  | 151  | 152  | 203  | 152  | 202  | 157  | 0    | 2031 | 145  | 241  | 233  | 1061 | 149  | 195  | 105  | 162  | 1086 | 166  | 2431 | 131  |
| LA1332 | USA      | 17 | 2059 | 2011 | 2009 | 2008 | 2009 | 2008 | 2086 | 2007 | 2008 | 2007 | 2008 | 2059 | 2008 | 2058 | 2040 | 2031 | 0    | 2028 | 2087 | 2080 | 2944 | 1989 | 2082 | 1988 | 2045 | 2933 | 2015 | 2340 | 2014 |
| MA1963 | USA      | 18 | 135  | 114  | 112  | 111  | 112  | 111  | 189  | 110  | 111  | 110  | 111  | 162  | 111  | 161  | 24   | 145  | 2028 | 0    | 187  | 180  | 1058 | 146  | 206  | 102  | 71   | 1082 | 163  | 2400 | 104  |
| OA0813 | UK       | 19 | 242  | 221  | 219  | 218  | 219  | 218  | 296  | 217  | 218  | 217  | 218  | 269  | 218  | 268  | 199  | 241  | 2087 | 187  | 0    | 144  | 1101 | 207  | 303  | 199  | 232  | 1144 | 226  | 2489 | 201  |
| OA0815 | UK       | 20 | 235  | 214  | 212  | 211  | 212  | 211  | 289  | 210  | 211  | 210  | 211  | 262  | 211  | 261  | 191  | 233  | 2080 | 180  | 144  | 0    | 1148 | 200  | 284  | 192  | 225  | 1137 | 218  | 2480 | 194  |
| QA5359 | Japan    | 21 | 1073 | 1052 | 1050 | 1049 | 1050 | 1049 | 1127 | 1048 | 1049 | 1048 | 1049 | 1100 | 1049 | 1099 | 1070 | 1061 | 2944 | 1058 | 1101 | 1148 | 0    | 1062 | 1122 | 1016 | 1075 | 69   | 1055 | 3344 | 1044 |
| QA5364 | Japan    | 22 | 177  | 156  | 154  | 153  | 154  | 153  | 231  | 152  | 153  | 152  | 153  | 199  | 153  | 203  | 158  | 149  | 1989 | 146  | 207  | 200  | 1062 | 0    | 210  | 106  | 163  | 1051 | 132  | 2432 | 124  |
| QA7284 | Japan    | 23 | 216  | 216  | 214  | 213  | 214  | 213  | 288  | 212  | 213  | 212  | 213  | 218  | 213  | 263  | 218  | 195  | 2082 | 206  | 303  | 284  | 1122 | 210  | 0    | 166  | 223  | 1147 | 205  | 2480 | 192  |
| SA0179 | USA      | 24 | 131  | 110  | 108  | 107  | 108  | 107  | 185  | 106  | 107  | 106  | 107  | 158  | 107  | 157  | 114  | 105  | 1988 | 102  | 199  | 192  | 1016 | 106  | 166  | 0    | 119  | 1041 | 121  | 2388 | 88   |
| TA9995 | USA      | 25 | 166  | 169  | 167  | 166  | 167  | 166  | 244  | 165  | 166  | 165  | 166  | 217  | 166  | 216  | 83   | 162  | 2045 | 71   | 232  | 225  | 1075 | 163  | 223  | 119  | 0    | 1099 | 180  | 2420 | 121  |
| VA5961 | Peru     | 26 | 1098 | 1077 | 1075 | 1074 | 1075 | 1074 | 1152 | 1073 | 1074 | 1073 | 1074 | 1079 | 1073 | 1124 | 1094 | 1086 | 2933 | 1082 | 1144 | 1137 | 69   | 1051 | 1147 | 1041 | 1099 | 0    | 1045 | 3369 | 1069 |
| VA9753 | USA      | 27 | 177  | 157  | 154  | 154  | 155  | 154  | 228  | 153  | 154  | 153  | 154  | 205  | 154  | 204  | 175  | 166  | 2015 | 163  | 226  | 218  | 1055 | 132  | 205  | 121  | 180  | 1045 | 0    | 2448 | 149  |
| ZA1576 | USA      | 28 | 2407 | 2383 | 2373 | 2380 | 2381 | 2380 | 2457 | 2379 | 2380 | 2379 | 2379 | 2426 | 2380 | 2429 | 2412 | 2431 | 2340 | 2400 | 2489 | 2480 | 3344 | 2432 | 2480 | 2388 | 2420 | 3369 | 2448 | 0    | 2414 |
| ZA5550 | USA      | 29 | 159  | 138  | 136  | 135  | 136  | 135  | 213  | 134  | 135  | 134  | 135  | 186  | 135  | 185  | 116  | 131  | 2014 | 104  | 201  | 194  | 1044 | 124  | 192  | 88   | 121  | 1069 | 149  | 2414 | 0    |

| H25 South | Country     | 1  | 2    | 3    | 4    | 5    | 6    | 7    | 8    | 9    | 10   | 11   | 12   | 13   | 14   | 15   | 16   | 17   | 18   | 19   | 20   | 21   | 22   | 23   | 24   | 25   | 26   | 27   | 28   | 29   | 30   | 31   | 32   | 33   | 34   | 35   | 36   | 37   | 38   | 39   | 40   | 41   | 42   | 43   | 44   | 45   | 46   | 47   | 48   | 49   | 50   | 51   | 52   | 53   | 54   | 55   |      |     |
|-----------|-------------|----|------|------|------|------|------|------|------|------|------|------|------|------|------|------|------|------|------|------|------|------|------|------|------|------|------|------|------|------|------|------|------|------|------|------|------|------|------|------|------|------|------|------|------|------|------|------|------|------|------|------|------|------|------|------|------|-----|
| EC0125    | Australia   | 1  | 0    | 813  | 1    | 98   | 82   | 698  | 689  | 696  | 82   | 121  | 77   | 53   | 110  | 3076 | 123  | 100  | 100  | 37   | 45   | 115  | 104  | 103  | 102  | 103  | 104  | 116  | 29   | 24   | 142  | 53   | 116  | 104  | 103  | 83   | 22   | 97   | 97   | 49   | 106  | 22   | 21   | 22   | 98   | 90   | 107  | 21   | 98   | 21   | 22   | 22   | 26   | 43   | 98   | 22   |      |     |
| CE1803A   | Australia   | 2  | 813  | 0    | 813  | 807  | 791  | 1402 | 1393 | 1400 | 780  | 880  | 806  | 802  | 820  | 3786 | 834  | 809  | 810  | 792  | 800  | 812  | 801  | 800  | 811  | 800  | 812  | 801  | 813  | 808  | 797  | 841  | 802  | 813  | 813  | 812  | 780  | 803  | 806  | 806  | 804  | 815  | 803  | 802  | 803  | 807  | 787  | 816  | 802  | 807  | 802  | 803  | 846  | 807  | 798  | 807  | 803  |     |
| EC0382    | Australia   | 3  | 1    | 813  | 0    | 98   | 82   | 698  | 689  | 696  | 83   | 121  | 77   | 54   | 111  | 3077 | 123  | 100  | 101  | 38   | 46   | 115  | 104  | 103  | 102  | 103  | 104  | 116  | 30   | 25   | 142  | 54   | 116  | 104  | 103  | 83   | 23   | 97   | 97   | 50   | 106  | 23   | 22   | 23   | 98   | 90   | 107  | 22   | 98   | 22   | 23   | 23   | 27   | 44   | 98   | 23   |      |     |
| FB9087    | USA         | 4  | 98   | 807  | 98   | 0    | 76   | 691  | 682  | 689  | 77   | 135  | 91   | 87   | 104  | 3070 | 119  | 94   | 95   | 77   | 85   | 109  | 98   | 97   | 96   | 97   | 98   | 110  | 93   | 82   | 137  | 87   | 110  | 98   | 97   | 77   | 88   | 91   | 91   | 89   | 99   | 88   | 87   | 88   | 92   | 84   | 100  | 87   | 92   | 87   | 88   | 131  | 92   | 83   | 91   | 88   |      |     |
| FB9797    | New Zealand | 5  | 82   | 791  | 82   | 76   | 0    | 673  | 664  | 671  | 61   | 119  | 75   | 71   | 89   | 3055 | 103  | 78   | 79   | 59   | 69   | 93   | 82   | 81   | 80   | 81   | 81   | 82   | 94   | 77   | 66   | 121  | 71   | 94   | 82   | 81   | 61   | 72   | 75   | 73   | 84   | 72   | 71   | 72   | 76   | 68   | 85   | 71   | 76   | 71   | 72   | 115  | 76   | 67   | 76   | 72   |      |     |
| GA9192    | UK          | 6  | 698  | 1402 | 698  | 691  | 673  | 0    | 9    | 8    | 677  | 735  | 691  | 687  | 705  | 3671 | 719  | 694  | 695  | 677  | 685  | 709  | 698  | 697  | 696  | 697  | 697  | 697  | 682  | 710  | 693  | 682  | 737  | 687  | 710  | 698  | 697  | 677  | 688  | 691  | 691  | 689  | 700  | 688  | 687  | 688  | 692  | 684  | 701  | 687  | 692  | 687  | 688  | 731  | 692  | 683  | 692  | 688 |
| GA9323    | UK          | 7  | 689  | 1393 | 689  | 682  | 664  | 9    | 0    | 15   | 668  | 726  | 682  | 678  | 696  | 3662 | 710  | 685  | 686  | 668  | 676  | 700  | 689  | 688  | 687  | 688  | 688  | 689  | 701  | 684  | 673  | 728  | 678  | 701  | 689  | 688  | 668  | 679  | 682  | 682  | 680  | 691  | 679  | 678  | 679  | 683  | 675  | 692  | 678  | 683  | 678  | 679  | 722  | 683  | 674  | 683  | 679  |     |
| GA9368    | UK          | 8  | 696  | 1400 | 696  | 689  | 671  | 8    | 15   | 0    | 675  | 733  | 689  | 685  | 703  | 3669 | 717  | 692  | 693  | 675  | 683  | 707  | 696  | 695  | 694  | 695  | 696  | 708  | 690  | 680  | 735  | 685  | 708  | 696  | 695  | 675  | 686  | 689  | 689  | 687  | 698  | 686  | 685  | 686  | 690  | 682  | 699  | 685  | 690  | 685  | 686  | 729  | 690  | 681  | 690  | 686  |      |     |
| IA1961    | Australia   | 9  | 82   | 780  | 83   | 77   | 61   | 677  | 668  | 675  | 0    | 120  | 76   | 71   | 90   | 3056 | 103  | 79   | 80   | 61   | 69   | 78   | 67   | 66   | 81   | 66   | 82   | 53   | 79   | 77   | 66   | 106  | 71   | 79   | 83   | 82   | 20   | 72   | 76   | 76   | 73   | 85   | 72   | 71   | 72   | 77   | 27   | 86   | 71   | 77   | 71   | 72   | 115  | 76   | 67   | 77   | 72   |     |
| JA0103    | Netherlands | 10 | 121  | 800  | 121  | 135  | 119  | 735  | 726  | 733  | 120  | 0    | 48   | 110  | 148  | 3114 | 162  | 137  | 138  | 100  | 108  | 152  | 141  | 140  | 139  | 140  | 140  | 141  | 153  | 116  | 105  | 181  | 110  | 153  | 141  | 140  | 120  | 111  | 134  | 134  | 112  | 143  | 111  | 110  | 111  | 135  | 127  | 144  | 110  | 135  | 110  | 111  | 154  | 115  | 106  | 135  | 111  |     |
| JA0175    | Netherlands | 11 | 77   | 806  | 77   | 91   | 75   | 691  | 682  | 689  | 76   | 48   | 0    | 66   | 104  | 3070 | 118  | 93   | 94   | 56   | 64   | 108  | 97   | 96   | 95   | 96   | 96   | 97   | 109  | 72   | 61   | 137  | 66   | 109  | 97   | 96   | 76   | 67   | 90   | 90   | 68   | 99   | 67   | 66   | 67   | 91   | 83   | 100  | 66   | 91   | 66   | 67   | 110  | 71   | 62   | 91   | 67   |     |
| PA1102    | Australia   | 12 | 53   | 802  | 54   | 87   | 71   | 687  | 678  | 685  | 71   | 110  | 66   | 0    | 99   | 3065 | 113  | 89   | 89   | 32   | 40   | 104  | 93   | 92   | 91   | 92   | 92   | 93   | 105  | 48   | 37   | 132  | 28   | 105  | 93   | 92   | 72   | 43   | 86   | 86   | 44   | 95   | 43   | 42   | 43   | 87   | 79   | 96   | 42   | 87   | 42   | 43   | 86   | 46   | 38   | 87   | 43   |     |
| QA5299    | Japan       | 13 | 110  | 820  | 111  | 104  | 89   | 705  | 696  | 703  | 90   | 148  | 104  | 99   | 0    | 3084 | 90   | 78   | 51   | 89   | 32   | 97   | 102  | 109  | 108  | 83   | 108  | 84   | 111  | 122  | 105  | 94   | 147  | 99   | 122  | 85   | 84   | 90   | 100  | 78   | 78   | 100  | 87   | 100  | 99   | 100  | 79   | 97   | 88   | 99   | 79   | 99   | 100  | 143  | 104  | 95   | 79   | 100 |
| RA2549    | Argentina   | 14 | 3076 | 3786 | 3077 | 3070 | 3055 | 3071 | 3062 | 3069 | 3056 | 3114 | 3070 | 3065 | 3084 | 0    | 3098 | 3072 | 3073 | 3054 | 3062 | 3088 | 3077 | 3076 | 3075 | 3076 | 3076 | 3077 | 3089 | 3071 | 3000 | 3012 | 3065 | 3089 | 3077 | 3076 | 3056 | 3066 | 3070 | 3070 | 3067 | 3079 | 3066 | 3065 | 3066 | 3071 | 3063 | 3080 | 3065 | 3071 | 3065 | 3066 | 3109 | 3070 | 3061 | 3071 | 3066 |     |
| RA4251    | Germany     | 15 | 123  | 834  | 123  | 119  | 103  | 719  | 710  | 717  | 103  | 162  | 118  | 113  | 90   | 3098 | 0    | 93   | 79   | 103  | 111  | 135  | 124  | 123  | 95   | 123  | 97   | 124  | 136  | 118  | 107  | 162  | 112  | 136  | 97   | 96   | 103  | 113  | 91   | 91   | 114  | 100  | 113  | 112  | 110  | 112  | 113  | 156  | 117  | 108  | 91   | 113  |      |      |      |      |      |     |
| RA5006    | Germany     | 16 | 100  | 809  | 100  | 94   | 78   | 694  | 685  | 692  | 79   | 137  | 93   | 89   | 78   | 3072 | 93   | 0    | 69   | 79   | 87   | 111  | 100  | 99   | 72   | 99   | 73   | 100  | 112  | 95   | 84   | 138  | 89   | 112  | 74   | 73   | 79   | 90   | 89   | 90   | 68   | 86   | 77   | 89   | 68   | 89   | 90   | 133  | 94   | 85   | 68   | 90   |      |      |      |      |      |     |
| RA6708    | USA         | 17 | 100  | 810  | 101  | 95   | 78   | 695  | 686  | 693  | 80   | 138  | 94   | 89   | 51   | 3073 | 79   | 69   | 0    | 79   | 87   | 112  | 101  | 100  | 73   | 100  | 74   | 101  | 113  | 95   | 84   | 140  | 89   | 112  | 75   | 74   | 80   | 90   | 68   | 68   | 91   | 77   | 90   | 89   | 90   | 69   | 87   | 89   | 69   | 89   | 90   | 133  | 94   | 85   | 69   | 90   |      |     |
| WA5546    | Australia   | 18 | 37   | 792  | 38   | 77   | 59   | 677  | 668  | 675  | 61   | 100  | 56   | 32   | 89   | 3054 | 103  | 79   | 79   | 0    | 10   | 94   | 83   | 82   | 81   | 82   | 82   | 83   | 95   | 32   | 21   | 123  | 32   | 95   | 83   | 82   | 62   | 27   | 76   | 76   | 20   | 85   | 27   | 26   | 27   | 77   | 69   | 86   | 26   | 77   | 26   | 27   | 70   | 31   | 10   | 77   | 27   |     |
| WA5591    | Australia   | 19 | 45   | 800  | 46   | 85   | 69   | 685  | 676  | 683  | 69   | 108  | 64   | 40   | 97   | 3062 | 111  | 87   | 87   | 10   | 0    | 102  | 91   | 90   | 89   | 90   | 91   | 103  | 40   | 29   | 130  | 40   | 103  | 91   | 90   | 70   | 35   | 84   | 28   | 93   | 35   | 34   | 35   | 85   | 77   | 94   | 34   | 85   | 34   | 35   | 78   | 39   | 18   | 85   | 35   |      |      |     |
| CE1636    | Australia   | 20 | 115  | 812  | 115  | 109  | 93   | 709  | 700  | 707  | 78   | 152  | 108  | 104  | 121  | 3088 | 135  | 111  | 112  | 94   | 102  | 0    | 67   | 66   | 113  | 66   | 114  | 99   | 3    | 110  | 99   | 32   | 104  | 3    | 115  | 114  | 78   | 105  | 108  | 108  | 106  | 117  | 105  | 104  | 105  | 109  | 85   | 118  | 104  | 109  | 104  | 105  | 105  | 109  | 100  | 109  | 105  |     |
| CE1564    | Australia   | 21 | 104  | 801  | 104  | 108  | 92   | 698  | 689  | 696  | 67   | 141  | 97   | 93   | 109  | 3077 | 124  | 100  | 101  | 83   | 91   | 67   | 0    | 1    | 102  | 1    | 103  | 88   | 68   | 99   | 88   | 95   | 93   | 68   | 104  | 103  | 67   | 94   | 97   | 97   | 95   | 106  | 94   | 93   | 94   | 98   | 74   | 107  | 93   | 98   | 93   | 94   | 98   | 89   | 98   | 94   |      |     |
| CE1573    | Australia   | 22 | 103  | 800  | 103  | 97   | 81   | 697  | 688  | 695  | 66   | 140  | 96   | 92   | 108  | 3076 | 123  | 99   | 100  | 82   | 90   | 66   | 1    | 0    | 101  | 0    | 102  | 87   | 67   | 98   | 87   | 94   | 92   | 67   | 103  | 102  | 66   | 93   | 96   | 96   | 94   | 105  | 93   | 92   | 93   | 97   | 73   | 106  | 92   | 97   | 92   | 93   | 93   | 97   | 88   | 97   | 93   |     |
| CE1600    | Australia   | 23 | 102  | 811  | 102  | 96   | 80   | 696  | 687  | 694  | 81   | 139  | 95   | 91   | 83   | 3075 | 95   | 72   | 73   | 81   | 89   | 113  | 102  | 101  | 0    | 101  | 3    | 102  | 114  | 97   | 86   | 141  | 91   | 114  | 4    | 3    | 81   | 92   | 55   | 55   | 93   | 64   | 92   | 91   | 92   | 56   | 88   | 65   | 91   | 56   | 91   | 92   | 92   | 96   | 87   | 54   | 92   |     |
| CE1638    | Australia   | 24 | 103  | 800  | 103  | 97   | 81   | 697  | 688  | 695  | 66   | 140  | 96   | 92   | 108  | 3076 | 123  | 99   | 100  | 82   | 90   | 66   | 1    | 0    | 101  | 0    | 102  | 87   | 67   | 98   | 87   | 94   | 92   | 67   | 103  | 102  | 66   | 93   | 96   | 96   | 94   | 105  | 93   | 92   | 93   | 97   | 73   | 106  | 92   | 97   | 92   | 93   | 93   | 97   | 88   | 97   | 93   |     |
| CE1590    | Australia   | 25 | 103  | 812  | 103  | 97   | 81   | 697  | 688  | 695  | 82   | 140  | 96   | 92   | 84   | 3076 | 97   | 73   | 74   | 82   | 90   | 114  | 103  | 102  | 3    | 102  | 0    | 103  | 115  | 98   | 87   | 142  | 92   | 115  | 5    | 4    | 82   | 93   | 56   | 56   | 94   | 65   | 93   | 92   | 93   | 57   | 89   | 66   | 92   | 57   | 92   | 93   | 136  | 97   | 88   | 54   | 93   |     |
| CE1628    | Australia   | 26 | 104  | 801  | 104  | 98   | 82   | 698  | 689  | 696  | 53   | 141  | 97   | 93   | 111  | 3077 | 124  | 100  | 101  | 83   | 91   | 99   | 88   | 87   | 102  | 87   | 103  | 0    | 100  | 99   | 88   | 128  | 93   | 100  | 104  | 103  | 53   | 94   | 97   | 97   | 95   | 106  | 94   | 93   | 94   | 98   | 60   | 107  | 93   | 94   | 98   | 89   | 98   | 98   | 94   |      |      |     |
| CE1634    | Australia   | 27 | 116  | 813  | 116  | 110  | 94   | 710  | 701  | 708  | 79   | 153  | 109  | 105  | 122  | 3089 | 136  | 112  | 113  | 95   | 103  | 3    | 68   | 67   | 114  | 67   | 115  | 100  | 0    | 111  | 100  | 29   | 105  | 0    | 116  | 115  | 79   | 106  | 109  | 109  | 107  | 118  | 106  | 105  | 106  | 110  | 86   | 119  | 105  | 110  | 105  | 106  | 110  | 101  | 110  | 106  |      |     |
| CE1619    | Australia   | 28 | 29   | 808  | 30   | 93   | 77   | 693  | 684  | 690  | 77</ |      |      |      |      |      |      |      |      |      |      |      |      |      |      |      |      |      |      |      |      |      |      |      |      |      |      |      |      |      |      |      |      |      |      |      |      |      |      |      |      |      |      |      |      |      |      |     |



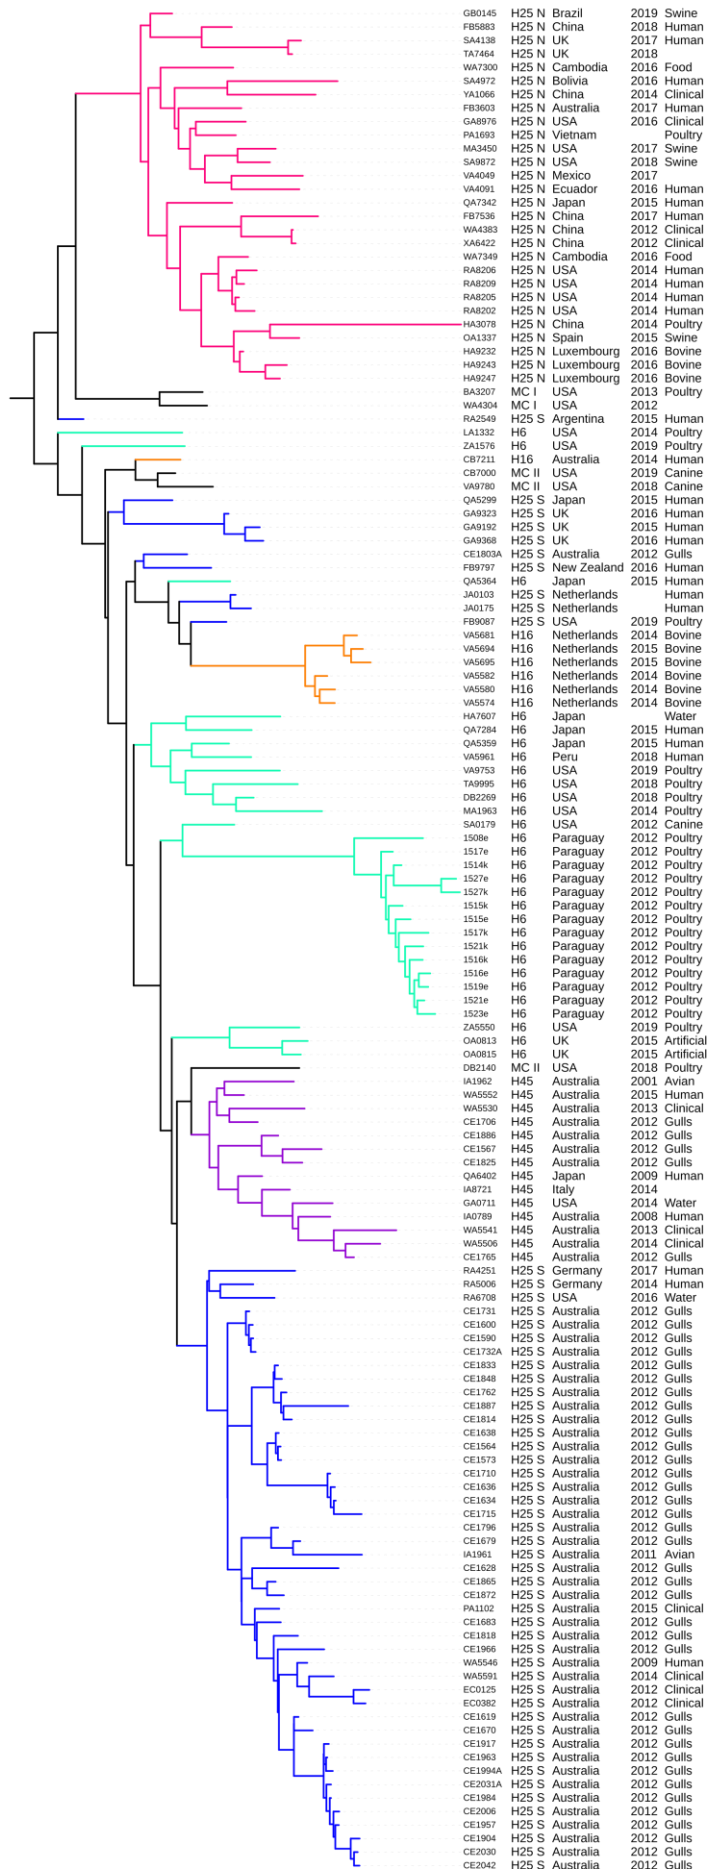

**Figure S2:** Phylogeny of accessory genome of *E. coli* ST457 collection. The branches colours are used respecting the colour of clades in core genome phylogeny - H16 (orange), H25 North (red), H6 (turquoise), H45 (purple) and H25 South (blue) to highlight to which extent the accessory clades coping the core genome clades. The metadata consists of strain name, clade of core genome in which the respected strain belongs, country of origin, year and source of origin.



**Figure S3:** BRIG comparison of all IncI1/ST23, Inc/ST315 and IncI1/ST314 plasmids from this study carrying *bla*<sub>CMY-2</sub> (lime). The strains with these plasmids coming from gulls (blue ST23, purple ST315 and orange ST314), human and clinical strains (red and pink), *Dacelo novaguineae* (yellow) and a single plasmid IncI1/ST265 (pS10584) coming from *Salmonella enterica* strain SJTUF10584 (green) from Shanghai. The plasmid labels are organized from the inner circle into columns.

Plasmids sharing identical structure (no gaps) and at least 90% identity of all regions with our reference IncI1/ST23 plasmid (CE1628, gull, Five Islands, GenBank MT468652) came from humans from Wollongong hospital (EC0125) and from Sydney (EC0382 and WA5530), gulls from Sydney (CE1765, CE1833, CE1865, CE1762, CE1872, CE1814, CE1887) and Five Islands (CE1619, CE1567) and *Salmonella enterica* strain SJTUF10584 (pS10584). This reveals that these identical plasmids were found in 58% (7/12) of Sydney gulls, 16% of Five Islands gulls (3/19) and none of Montague island gulls.

**Table S3:** MIC values to 24 different antibiotics or their combinations for CE1628 strain which carried *bla<sub>OXA-23</sub>* within its chromosome. The resistance/susceptibility was determined using CLSI breakpoints. NA is used when the breakpoint was not available for the respected antibiotics.

| <b>ATB</b>                   | <b>CE1628 MIC (mg/L)</b> | <b>CLSI</b>  |
|------------------------------|--------------------------|--------------|
| Ampicilin                    | >128                     | Resistant    |
| Ampicilin-sulbactam          | 32                       | Resistant    |
| Cefazolin                    | >16                      | Intermediate |
| Cefuroxime                   | 64                       | Resistant    |
| Piperacilin                  | 32                       | Susceptible  |
| Piperacillin-tazobactam      | 2                        | Susceptible  |
| Cefotaxime                   | >8                       | Resistant    |
| Cefaclor                     | 16                       | Susceptible  |
| Cefprozil                    | 64                       | Resistant    |
| Cefepime                     | 1                        | Susceptible  |
| Cefoperazone-sulbactam       | 16                       | NA           |
| Meropenem                    | <0.125                   | Susceptible  |
| Ertapenem                    | 1                        | Intermediate |
| Aztreonam                    | 8                        | Intermediate |
| Netilmicin                   | 0.25                     | Susceptible  |
| Tobramycin                   | 0.5                      | Susceptible  |
| Gentamicin                   | 0.5                      | Susceptible  |
| Amikacin                     | <0.5                     | Susceptible  |
| Tigecycline                  | 0.125                    | NA           |
| Colistin                     | 0.25                     | Susceptible  |
| Sulfomethoxazol-trimethoprim | 0.25                     | Susceptible  |
| Ciprofloxacin                | <0.063                   | Susceptible  |
| Chloramphenicol              | 4                        | Susceptible  |
| Tetracyclin                  | 1                        | Susceptible  |



**Table S4:** Genetic regions detected in at least 95% of our *E. coli* ST457 strains and not present in a reference genome of *E. coli* K-12 substrain (MG1655) using RAST annotation and position in CE1628 chromosome (SAMN14966947).

| <b>Cluster</b>                                    | <b>RAST annotation</b>                                                                                                      | <b>Position</b> |
|---------------------------------------------------|-----------------------------------------------------------------------------------------------------------------------------|-----------------|
| <b>AA</b>                                         | Putative sugar kinase, PfkB family protein                                                                                  | 3626..4588      |
|                                                   | ABC transporter, permease protein (cluster 2, ribose/xylose/arabinose/galactose)                                            | 4610..5599      |
|                                                   | Putative ribose/galactose/methyl galactoside import ATP-binding protein 1                                                   | 5600..7099      |
|                                                   | ABC transporter, substrate-binding protein (cluster 2, ribose/xylose/arabinose/galactose)                                   | 7160..8050      |
|                                                   | Tagatose-1,6-bisphosphate aldolase GatY                                                                                     | 8086..8940      |
|                                                   | Aga operon transcriptional repressor, DeoR family                                                                           | 9297..10112     |
| <b>AC</b>                                         | RelE-like translational repressor toxin                                                                                     | 117831..118148  |
|                                                   | Antitoxin to RelE-like translational repressor toxin                                                                        | 118207..118503  |
| <b>AD</b>                                         | putative membrane protein                                                                                                   | 147584..148189  |
|                                                   | hypothetical protein                                                                                                        | 148192..149184  |
|                                                   | Phosphate ABC transporter, substrate-binding protein PstS                                                                   | 149210..150715  |
| <b>AE</b>                                         | Putative DNA processing chain A                                                                                             | 162419..163621  |
|                                                   | ATP-dependent DNA helicase RecQ                                                                                             | 163621..165717  |
| <b>AF</b>                                         | FIG00643143: hypothetical protein                                                                                           | 198036..198344  |
| <b>AG</b>                                         | HicB-like protein                                                                                                           | 208916..209275  |
|                                                   | HicA-like protein                                                                                                           | 209272..209547  |
| <b>AH</b>                                         | Arsenical resistance operon repressor                                                                                       | 234432..234752  |
|                                                   | Uncharacterized membrane protein, YraQ family                                                                               | 234859..235860  |
| <b>AI</b>                                         | Hemin transport protein HmuS                                                                                                | 239219..240247  |
|                                                   | TonB-dependent hemin, ferrichrome receptor                                                                                  | 240296..242278  |
|                                                   | hypothetical protein                                                                                                        | 242647..242808  |
|                                                   | Periplasmic hemin-binding protein                                                                                           | 242962..243876  |
|                                                   | Radical SAM family protein HutW, similar to coproporphyrinogen III oxidase, oxygen-independent, associated with heme uptake | 243896..245233  |
|                                                   | Putative heme iron utilization protein                                                                                      | 245246..245740  |
|                                                   | Flavin reductase (EC 1.5.1.30)                                                                                              | 245740..246363  |
|                                                   | Hemin ABC transporter, permease protein                                                                                     | 246412..247404  |
| ABC-type hemin transport system, ATPase component | 247401..248171                                                                                                              |                 |
| <b>AK</b>                                         | Transcriptional regulator, AraC family                                                                                      | 344711..345526  |
|                                                   | Xyloside transporter XynT                                                                                                   | 345752..347152  |
|                                                   | Putative glycosyl hydrolase of unknown function                                                                             | 347163..349142  |

|           |                                                                                                               |                |
|-----------|---------------------------------------------------------------------------------------------------------------|----------------|
| <b>AK</b> | (DUF1680)                                                                                                     |                |
|           | Prophage Lp2 protein 6                                                                                        | 350339..351418 |
| <b>AL</b> | hypothetical protein                                                                                          | 353105..354400 |
| <b>AM</b> | Per-activated serine protease autotransporter enterotoxin EspC / autotransporter domain, T5aSS type secretion | 359967..363776 |
|           | hypothetical protein                                                                                          | 363948..364466 |
|           | Protein fanG precursor                                                                                        | 364459..364980 |
|           | Protein fanF precursor                                                                                        | 364994..365965 |
|           | Chaperone protein fanE precursor                                                                              | 365995..366690 |
|           | hypothetical protein                                                                                          | 366683..369040 |
|           | hypothetical protein                                                                                          | 369112..369639 |
|           | hypothetical protein                                                                                          | 370382..370888 |
|           | HTH-type transcriptional regulator gadW                                                                       | 371080..371910 |
| <b>AN</b> | putative lipoprotein                                                                                          | 379271..379954 |
|           | hypothetical protein                                                                                          | 379998..384413 |
| <b>AP</b> | protein of unknown function DUF1498                                                                           | 436052..436732 |
|           | ROK family sugar kinase or transcriptional regulator                                                          | 436713..437645 |
|           | Fructose-bisphosphate aldolase class II homolog                                                               | 437693..438553 |
|           | Fructose-bisphosphate aldolase class II (EC 4.1.2.13) homolog                                                 | 438634..439485 |
|           | PTS system, IIC component                                                                                     | 439497..440588 |
|           | PTS system, IIB component                                                                                     | 440613..440927 |
|           | PTS system, IIA component                                                                                     | 440945..441415 |
|           | Transcription antiterminator, BglG family                                                                     | 441442..442995 |
| <b>AR</b> | RelE-like translational repressor toxin                                                                       | 470535..470813 |
|           | Antitoxin to RelE-like translational repressor toxin                                                          | 470826..471149 |
| <b>AS</b> | hypothetical protein                                                                                          | 480204..481643 |
|           | hypothetical protein                                                                                          | 481922..483205 |
| <b>AT</b> | Maltose-6'-phosphate glucosidase                                                                              | 493295..494617 |
| <b>AV</b> | hypothetical protein                                                                                          | 534486..536984 |
|           | hypothetical protein                                                                                          | 537144..537257 |
| <b>AW</b> | hypothetical protein                                                                                          | 542238..543308 |
|           | adhesin                                                                                                       | 543319..545841 |
|           | fimbrial chaperone protein                                                                                    | 545866..546597 |
|           | adhesin                                                                                                       | 546645..547217 |
| <b>AX</b> | hypothetical protein                                                                                          | 629581..631608 |
|           | hypothetical protein                                                                                          | 631980..632534 |
| <b>AY</b> | hypothetical protein                                                                                          | 638555..639457 |
| <b>AZ</b> | FIG00638425: hypothetical protein                                                                             | 641660..642157 |
|           | hypothetical protein                                                                                          | 642154..643002 |
| <b>BA</b> | hypothetical protein                                                                                          | 655306..656202 |
|           | Cytosine/purine/uracil/thiamine/allantoin permease family protein                                             | 656280..657503 |

|           |                                                                      |                |
|-----------|----------------------------------------------------------------------|----------------|
| <b>BA</b> | Amidase                                                              | 657529..657918 |
|           | Carbamate kinase                                                     | 657935..658891 |
|           | Uncharacterized protein YahG                                         | 658884..660308 |
|           | Membrane protein FdrA                                                | 660305..661864 |
|           | Isochorismatase                                                      | 662825..663493 |
| <b>BB</b> | Tripartite tricarboxylate transporter TctA family                    | 665620..667110 |
|           | Tripartite tricarboxylate transporter TctB family                    | 667123..667629 |
|           | 2-dehydro-3-deoxyphosphogalactonate aldolase                         | 668645..669274 |
|           | 2-dehydro-3-deoxygalactonokinase                                     | 669264..670268 |
|           | D-galactonate regulator, IclR family                                 | 670292..671059 |
| <b>BD</b> | hypothetical protein                                                 | 733701..735515 |
| <b>BE</b> | toxin                                                                | 736869..737243 |
| <b>BF</b> | Hsp90xo protein                                                      | 744143..745978 |
|           | hypothetical protein                                                 | 745980..748286 |
| <b>BG</b> | Putative glycoporin                                                  | 754779..756173 |
| <b>BH</b> | hypothetical protein                                                 | 783029..783655 |
|           | hypothetical protein                                                 | 783778..784452 |
| <b>BI</b> | Nucleoside-specific channel-forming protein Tsx precursor            | 798027..798887 |
|           | 5'-nucleotidase (EC 3.1.3.5)                                         | 798966..800585 |
|           | 5'-nucleotidase (EC 3.1.3.5)                                         | 800626..802176 |
|           | hypothetical protein                                                 | 802409..803536 |
|           | 5'-nucleotidase (EC 3.1.3.5)                                         | 803669..805222 |
| <b>BJ</b> | Mannonate dehydratase                                                | 831502..832716 |
|           | L-galactonate transporter                                            | 832783..834066 |
| <b>BK</b> | Ribokinase (EC 2.7.1.15)                                             | 865287..866504 |
|           | hypothetical protein                                                 | 866506..868005 |
|           | hypothetical protein                                                 | 867998..870652 |
|           | hypothetical protein                                                 | 870683..871333 |
| <b>BM</b> | Shikimate 5-dehydrogenase I gamma (EC 1.1.1.25)                      | 908285..909097 |
|           | L-sorbose 1-phosphate reductase                                      | 909090..910319 |
|           | PTS system, sorbose-specific IID component                           | 910371..911195 |
|           | PTS system, sorbose-specific IIC component                           | 911206..912003 |
|           | PTS system, sorbose-specific IIB component                           | 912069..912563 |
|           | PTS system, sorbose-specific IIA component                           | 912563..912970 |
|           | Sorbitol-6-phosphate 2-dehydrogenase                                 | 912980..913786 |
|           | Sorbitol operon regulator SorC                                       | 913856..914803 |
| <b>BN</b> | Putative stomatin/prohibitin-family membrane protease subunit aq_911 | 916825..917952 |
|           | Uncharacterized protein YcgL                                         | 917958..918749 |
|           | hypothetical protein                                                 | 918763..919218 |
|           | hypothetical protein                                                 | 919215..919922 |
|           | Phage tail fiber protein H                                           | 919919..921499 |
|           | Phage tail formation protein I                                       | 921502..922218 |
|           | Phage baseplate assembly protein J                                   | 922211..923326 |

|           |                                                                                                 |                  |
|-----------|-------------------------------------------------------------------------------------------------|------------------|
| <b>BN</b> | Phage baseplate assembly protein                                                                | 922211..923326   |
|           | Phage baseplate assembly protein V                                                              | 923775..924476   |
|           | Phage tail formation protein D                                                                  | 924486..925526   |
|           | Phage Tail Protein X                                                                            | 925514..925723   |
|           | Phage tail protein U                                                                            | 925723..926676   |
|           | Phage tail length tape-measure protein T                                                        | 926676..929051   |
|           | hypothetical protein                                                                            | 929153..929281   |
|           | Phage tail protein E                                                                            | 929241..929558   |
|           | Phage tail tube protein FII                                                                     | 929609..930133   |
|           | Phage tail sheath protein FI                                                                    | 930133..931557   |
|           | hypothetical protein                                                                            | 931547..931744   |
|           | hypothetical protein                                                                            | 931741..932196   |
|           | Putative inner membrane protein                                                                 | 932341..932655   |
|           | Phage lytic murein transglycosylase                                                             | 932668..933273   |
|           | Putative inner membrane protein                                                                 | 933276..933563   |
| <b>BO</b> | hypothetical protein                                                                            | 934101..934448   |
|           | hypothetical protein                                                                            | 1081708..1081842 |
|           | Mobile element protein                                                                          | 1081949..1082209 |
|           | Transposase                                                                                     | 1082302..1082730 |
|           | hypothetical protein                                                                            | 1082873..1083586 |
| <b>BP</b> | Inner membrane protein YjeO                                                                     | 1083583..1083900 |
|           | TRAP-type C4-dicarboxylate transport system, periplasmic component                              | 1124454..1125425 |
|           | TRAP-type C4-dicarboxylate transport system, large permease component                           | 1125478..1126779 |
|           | TRAP-type transport system, small permease component, predicted N-acetylneuraminate transporter | 1126822..1127298 |
|           | Succinate dehydrogenase flavoprotein subunit                                                    | 1127319..1129400 |
|           | Acetyl-CoA:acetoacetyl-CoA transferase alpha subunit                                            | 1129397..1130938 |
|           | 3-hydroxybutyryl-CoA dehydratase                                                                | 1130948..1131724 |
|           | Oxidoreductase, short-chain dehydrogenase/reductase family                                      | 1132586..1133377 |
| <b>BR</b> | RelB/StbD replicon stabilization protein (antitoxin to RelE/StbE)                               | 1167572..1167814 |
|           | mRNA interferase RelE                                                                           | 1167804..1168094 |
| <b>BT</b> | Type I restriction-modification system, restriction subunit R (EC 3.1.21.3)                     | 1260149..1260811 |
|           | Type I restriction-modification system, DNA-methyltransferase subunit M (EC 2.1.1.72)           | 1260808..1260984 |
|           | hypothetical protein                                                                            | 1261029..1262195 |
|           | hypothetical protein                                                                            | 1262392..1262679 |
|           | hypothetical protein                                                                            | 1262666..1262968 |
| <b>BU</b> | Putative cryptic D-serine deaminase (EC 4.3.1.18)                                               | 1266640..1267860 |
|           | N-acyl-D-amino-acid deacylase                                                                   | 1268061..1269503 |

|           |                                                              |                  |
|-----------|--------------------------------------------------------------|------------------|
| <b>BU</b> | RidA/YER057c/UK114 superfamily protein                       | 1269513..1269902 |
|           | sodium-solute symporter, putative                            | 1270005..1271474 |
|           | Transcriptional regulator of RpiR family in catabolic operon | 1271484..1272347 |
| <b>BW</b> | hypothetical protein                                         | 1385799..1385936 |
|           | hypothetical protein                                         | 1386118..1386879 |
|           | Arylsulfatase                                                | 1386899..1388392 |
|           | hypothetical protein                                         | 1388522..1389766 |
| <b>BX</b> | alpha-xylosidase                                             | 1392207..1394246 |
|           | Putative Na <sup>+</sup> /galactoside symporter STM0042      | 1394286..1395659 |
| <b>BY</b> | FIG00641998: hypothetical protein                            | 1425867..1426316 |
|           | hypothetical protein                                         | 1426352..1426951 |
| <b>BZ</b> | FIG00642063: hypothetical protein                            | 1446419..1446571 |
|           | Mobile element protein                                       | 1446626..1446748 |
|           | hypothetical protein                                         | 1446876..1447724 |
|           | FIG00641699: hypothetical protein                            | 1447731..1448153 |
| <b>CA</b> | hypothetical protein                                         | 1452764..1453333 |
| <b>CC</b> | Uncharacterized protein YadD                                 | 1524729..1525661 |
| <b>CD</b> | SAM-dependent methyltransferase YafE (UbiE paralog)          | 1608842..1609612 |
| <b>CF</b> | Protein with similarity to RtcB                              | 1627140..1628279 |
| <b>CG</b> | hypothetical protein                                         | 1628898..1629461 |
| <b>CI</b> | putative NADH-dependent flavin oxidoreductase                | 1667232..1668374 |
|           | Dienelactone hydrolase and related enzymes                   | 1668619..1669539 |
|           | Transcriptional regulator, LysR family                       | 1669633..1670622 |
|           | Oxidoreductase, aldo/keto reductase family                   | 1671747..1672736 |
|           | Oxidoreductase, aldo/keto reductase family                   | 1672763..1673614 |
| <b>CJ</b> | Putative adhesin                                             | 1674180..1678433 |
| <b>CK</b> | Oxidoreductase, aldo/keto reductase family                   | 1679659..1680528 |
| <b>CL</b> | hypothetical protein                                         | 1767310..1767765 |
| <b>CM</b> | hypothetical protein                                         | 1783133..1784578 |
| <b>CN</b> | ParD protein (antitoxin to ParE)                             | 1790888..1791130 |
|           | ParE toxin protein                                           | 1791123..1791404 |
| <b>CP</b> | hypothetical protein                                         | 1809179..1809334 |
|           | FIG00639058: hypothetical protein                            | 1809443..1810000 |
|           | FIG00639058: hypothetical protein                            | 1810006..1810287 |
|           | hypothetical protein                                         | 1810343..1810885 |
|           | hypothetical protein                                         | 1810869..1811180 |
| <b>CR</b> | hypothetical protein                                         | 1880215..1880418 |
|           | putative lipoprotein                                         | 1880415..1880837 |
|           | adhesin/invasin-like protein [similarity]                    | 1880891..1881907 |
|           | FIG00640270: hypothetical protein                            | 1882005..1882127 |
|           | hypothetical protein                                         | 1882273..1882635 |
| <b>CT</b> | YVTN beta-propeller repeat-containing protein                | 2074053..2075930 |
| <b>CU</b> | FIG00640465: hypothetical protein                            | 2084189..2084626 |



|           |                                                                           |                  |
|-----------|---------------------------------------------------------------------------|------------------|
| <b>CV</b> | hypothetical protein                                                      | 2123470..2124183 |
|           | Demethylmenaquinone methyltransferase-like protein                        | 2124447..2125133 |
|           | hypothetical protein                                                      | 2125146..2126159 |
|           | Oxidoreductase, short-chain dehydrogenase/reductase family                | 2126171..2126926 |
|           | Altronate hydrolase                                                       | 2126941..2127252 |
|           | Altronate dehydratase                                                     | 2127252..2128448 |
|           | TRAP transporter solute receptor, unknown substrate 8                     | 2128476..2129444 |
|           | TRAP dicarboxylate transporter, DctQ subunit, unknown substrate 8         | 2129504..2129965 |
|           | TRAP dicarboxylate transporter, DctM subunit, unknown substrate 8         | 2129965..2131275 |
| <b>CW</b> | RtcB-like protein                                                         | 2143004..2144401 |
|           | hypothetical protein                                                      | 2144607..2144759 |
|           | Urocanate hydratase                                                       | 2145159..2146856 |
|           | Cytosine/purine/uracil/thiamine/allantoin permease family protein         | 2147020..2148429 |
|           | Conserved hypothetical protein (perhaps related to histidine degradation) | 2148431..2149021 |
|           | Imidazolonepropionase                                                     | 2149018..2150229 |
|           | Formiminoglutamase                                                        | 2150229..2151179 |
|           | Histidine ammonia-lyase                                                   | 2151230..2152900 |
|           | Transcriptional regulator, LysR family                                    | 2153171..2154076 |
|           | Cob(D)alamin adenosyltransferase                                          | 2154110..2154712 |
|           | Fumarate hydratase class I                                                | 2154722..2156374 |
|           | Putative symport protein                                                  | 2156482..2157762 |
|           | hypothetical protein                                                      | 2157923..2158240 |
|           | DNA for 3-methylaspartate ammonia-lyase, glutamate mutase                 | 2158237..2159607 |
|           | Methylaspartate ammonia-lyase                                             | 2159611..2160852 |
|           | Methylaspartate mutase, E subunit                                         | 2160852..2162297 |
|           | Uncharacterized protein GlnL                                              | 2162316..2163704 |
|           | Methylaspartate mutase, S subunit                                         | 2163704..2164153 |
|           | hypothetical protein                                                      | 2164700..2165122 |
|           | hypothetical protein                                                      | 2165203..2166147 |
| <b>CX</b> | Prevent host death protein, Phd antitoxin                                 | 2226987..2227427 |
|           | hypothetical protein                                                      | 2227427..2227708 |
| <b>CZ</b> | Antitoxin to RelE-like translational repressor toxin                      | 2272580..2272909 |
|           | RelE-like translational repressor toxin                                   | 2272899..2273285 |
| <b>DA</b> | hypothetical protein                                                      | 2301648..2303450 |
| <b>DC</b> | Molybdate metabolism regulator                                            | 2348701..2352501 |
| <b>DD</b> | Integrase                                                                 | 2363694..2365001 |

|           |                                                                          |                  |
|-----------|--------------------------------------------------------------------------|------------------|
| <b>DD</b> | 5-methylcytosine-specific restriction enzyme A (EC 3.1.21.)              | 2365130..2365855 |
|           | hypothetical protein                                                     | 2365933..2366280 |
|           | Putative transcription regulator                                         | 2366391..2366855 |
|           | resolvase                                                                | 2367022..2367573 |
|           | hypothetical protein                                                     | 2367754..2367876 |
|           | hypothetical protein                                                     | 2369338..2369520 |
|           | hypothetical protein                                                     | 2369667..2370386 |
|           | hypothetical protein                                                     | 2370398..2370643 |
|           | hypothetical protein                                                     | 2370809..2371048 |
| <b>DE</b> | FIG00638046: hypothetical protein                                        | 2389168..2389464 |
|           | Transcriptional regulator                                                | 2389466..2389717 |
| <b>DG</b> | Helix-turn-helix motif                                                   | 2415956..2416246 |
|           | Phage protein                                                            | 2416236..2416574 |
| <b>DO</b> | Transcriptional regulator, AraC family                                   | 3005628..3006641 |
|           | hypothetical protein                                                     | 3006694..3007092 |
| <b>DP</b> | Transcriptional regulator, GntR family                                   | 3009450..3010148 |
|           | FIG00639603: hypothetical protein                                        | 3010195..3010338 |
|           | PTS system, cellobiose-specific IIB component                            | 3010347..3010658 |
|           | PTS system, cellobiose-specific IIC component                            | 3010772..3011629 |
|           | PTS system, cellobiose-specific IIC component                            | 3011696..3012094 |
|           | PTS system, cellobiose-specific IIA component                            | 3012122..3012433 |
|           | Outer membrane porin                                                     | 3012489..3014162 |
|           | 6-phospho-beta-glucosidase                                               | 3014187..3015626 |
| <b>DQ</b> | Uncharacterized GGDEF domain protein YneF                                | 3024064..3025482 |
| <b>DR</b> | Type-1 fimbrial protein, A chain                                         | 3044366..3044929 |
|           | chaperone FimC                                                           | 3045292..3046002 |
|           | Outer membrane usher protein FimD                                        | 3046044..3048695 |
| <b>DS</b> | Toxin HigB                                                               | 3115551..3115829 |
| <b>DT</b> | Outer membrane porin OmpD                                                | 3122125..3123225 |
|           | hypothetical protein                                                     | 3123395..3124654 |
| <b>DV</b> | Putative alkyl/aryl-sulfatase YjcS                                       | 3138892..3140868 |
|           | hypothetical protein                                                     | 3140963..3142012 |
| <b>DY</b> | Multidrug resistance transporter, Bcr/CflA family                        | 3264356..3265519 |
|           | Efflux transport system, outer membrane factor (OMF) lipoprotein         | 3265528..3266901 |
|           | RND efflux system, inner membrane transporter                            | 3266905..3270012 |
|           | RND efflux system, membrane fusion protein                               | 3270012..3271133 |
|           | Transcriptional regulator, AcrR family                                   | 3271282..3271848 |
| <b>DZ</b> | FIG00640233: hypothetical protein                                        | 3295641..3295949 |
|           | hypothetical membrane protein                                            | 3295959..3296981 |
| <b>ED</b> | ABC transporter, substrate-binding protein (cluster 8, B12/iron complex) | 3375281..3376303 |
|           | ABC transporter, permease protein (cluster 8,                            | 3376303..3377283 |

|           |                                                                                          |                  |
|-----------|------------------------------------------------------------------------------------------|------------------|
| <b>ED</b> | B12/iron complex)                                                                        |                  |
|           | ABC transporter, ATP-binding protein (cluster 8, B12/iron complex)                       | 3377280..3378038 |
|           | Orf2                                                                                     | 3378048..3378860 |
|           | Molybdenum transport system protein ModD                                                 | 3378857..3379711 |
|           | Putative TonB dependent outer membrane receptor                                          | 3379737..3381707 |
| <b>EE</b> | FIG00640682: hypothetical protein                                                        | 3386524..3386685 |
|           | hypothetical protein                                                                     | 3387024..3388460 |
| <b>EG</b> | Uncharacterized protein STM4317                                                          | 3473624..3473917 |
|           | Acetyltransferase                                                                        | 3473914..3474408 |
| <b>EI</b> | Transcriptional regulator STM2195                                                        | 3704379..3704768 |
|           | L-serine dehydratase, beta subunit (EC 4.3.1.17) / L-serine dehydratase, alpha subunit   | 3704770..3706122 |
|           | hypothetical protein                                                                     | 3706131..3706253 |
|           | Phosphoserine phosphatase                                                                | 3706333..3707220 |
|           | Uncharacterized MFS-type transporter STM2198                                             | 3707253..3708575 |
| <b>EJ</b> | Uncharacterized dehydratase STM2273                                                      | 3801510..3802712 |
|           | Uncharacterized MFS-type transporter                                                     | 3802725..3804053 |
|           | Transcriptional regulator STM2275, GntR family                                           | 3804291..3804989 |
| <b>EK</b> | Uncharacterized MFS-type transporter                                                     | 3814910..3816100 |
|           | Transcriptional regulator STM2281, LysR family                                           | 3816252..3817151 |
| <b>EL</b> | Na <sup>+</sup> /H <sup>+</sup> antiporter NhaC                                          | 3885540..3886979 |
|           | Cystathionine beta-lyase                                                                 | 3886976..3888193 |
| <b>EM</b> | ATP-binding protein                                                                      | 3915179..3916537 |
|           | hypothetical protein                                                                     | 3916521..3917180 |
| <b>EP</b> | RatA homolog                                                                             | 4205692..4213767 |
|           | SinI homolog                                                                             | 4213877..4214869 |
|           | adherence and invasion outermembrane protein (Inv,enhances Peyer's patches colonization) | 4214925..4217099 |
| <b>ER</b> | Transcriptional regulator, GntR family domain / Aspartate aminotransferase (EC 2.6.1.1)" | 4360629..4361963 |
|           | hypothetical protein                                                                     | 4362051..4362482 |
| <b>ES</b> | hypothetical protein                                                                     | 4404126..4404899 |
| <b>ET</b> | Molybdate-binding domain of ModE                                                         | 4418809..4419237 |
| <b>EU</b> | Hydroxyaromatic non-oxidative decarboxylase protein D (EC 4.1.1.-)                       | 4423272..4423508 |
|           | Hydroxyaromatic non-oxidative decarboxylase protein C                                    | 4423519..4424946 |
|           | Hydroxyaromatic non-oxidative decarboxylase protein B (EC 4.1.1.-)                       | 4424946..4425539 |
|           | Transcriptional regulator, MarR family                                                   | 4425686..4426093 |
| <b>EV</b> | Hok/Gef-like protein                                                                     | 4437399..4437551 |
| <b>EW</b> | Fructokinase                                                                             | 4453774..4454691 |
|           | Sucrose outer membrane porin                                                             | 4454862..4456379 |

|           |                                                                                                        |                  |
|-----------|--------------------------------------------------------------------------------------------------------|------------------|
| <b>EW</b> | PTS system, sucrose-specific IIB component (EC 2.7.1.211) / PTS system, sucrose-specific IIC component | 4456440..4457810 |
|           | Sucrose-6-phosphate hydrolase                                                                          | 4457816..4459219 |
|           | Sucrose operon repressor ScrR, LacI family                                                             | 4459245..4460252 |
| <b>EX</b> | LemA PROTEIN                                                                                           | 4461181..4461783 |
|           | hypothetical protein                                                                                   | 4461797..4462690 |
|           | hypothetical protein                                                                                   | 4462705..4463853 |
| <b>EY</b> | D-3-phosphoglycerate dehydrogenase                                                                     | 4505746..4506693 |
|           | D-arabinose-5-phosphate isomerase                                                                      | 4506765..4507361 |
|           | Cystathionine beta-lyase MalY (EC 4.4.1.8)                                                             | 4507364..4508539 |
|           | Maltose regulon modulator                                                                              |                  |
|           | PTS system, maltose and glucose-specific IIC component / PTS system, maltose and glucose-specific IIB  | 4508539..4510119 |
|           | Beta-glucoside bgl operon antiterminator, BglG family                                                  | 4510151..4510975 |
|           | FIG00643868: hypothetical protein                                                                      | 4511110..4511223 |
| <b>FC</b> | General secretion pathway protein K                                                                    | 4764842..4765819 |
|           | General secretion pathway protein J                                                                    | 4765816..4766421 |
|           | General secretion pathway protein I                                                                    | 4766418..4766789 |
|           | General secretion pathway protein H                                                                    | 4766786..4767349 |
|           | General secretion pathway protein G                                                                    | 4767353..4767808 |
|           | General secretion pathway protein F                                                                    | 4767825..4769048 |
|           | General secretion pathway protein E                                                                    | 4769048..4770541 |
|           | General secretion pathway protein D                                                                    | 4770541..4772601 |
| <b>FI</b> | Alpha-fimbriae tip adhesin                                                                             | 4924270..4925349 |
|           | Alpha-fimbriae usher protein                                                                           | 4925346..4928030 |
|           | Alpha-fimbriae major subunit                                                                           | 4928121..4928621 |
|           | hypothetical protein                                                                                   | 4928651..4929367 |
|           | hypothetical protein                                                                                   | 4929449..4929577 |
| <b>FJ</b> | PTS system, N-acetylgalactosamine-specific IIC component                                               | 4963482..4964261 |
|           | PTS system, N-acetylgalactosamine-specific IID component                                               | 4964251..4965129 |
|           | PTS system, N-acetylgalactosamine-specific IIA component, PTS system, galactosamine-specific IIA       | 4965147..4965581 |
|           | N-acetylgalactosamine-6-phosphate deacetylase                                                          | 4965578..4966711 |
| <b>FK</b> | hypothetical protein                                                                                   | 5050200..5050994 |

**Table S5:** Genetic regions shared by chromosomes of our three PacBio sequences (CE1628, CE1803A and 1517k) and not present in a reference genome of *E. coli* K-12 substrain (MG1655) which were detected in less than 95% of *E. coli* ST457 strains.

| <b>Cluster</b> | <b>Rast annotation</b>                                                                       | <b>Position</b>  |
|----------------|----------------------------------------------------------------------------------------------|------------------|
| <b>AB</b>      | Leader peptidase HopD                                                                        | 57296..57763     |
| <b>AJ</b>      | Small inner membrane protein, YmgF family                                                    | 292942..293109   |
| <b>AJ</b>      | Mobile element protein                                                                       | 293289..293420   |
|                | Small inner membrane protein, YmgF family                                                    | 293425..293592   |
|                | hypothetical protein                                                                         | 293717..293893   |
|                | Small inner membrane protein, YmgF family                                                    | 293909..294076   |
| <b>AO</b>      | O-antigen ligase                                                                             | 402968..404221   |
|                | Beta-1,3-glucosyltransferase                                                                 | 404267..405250   |
|                | UDP-galactose:(galactosyl) LPS<br>alpha1,2-galactosyltransferase WaaW                        | 405332..406360   |
| <b>AQ</b>      | Type III secretion chaperone protein for YopD (SycD)                                         | 451870..452367   |
|                | FIG00643201: hypothetical protein                                                            | 452377..452559   |
|                | cell invasion protein SipB                                                                   | 452615..454396   |
|                | FIG00637902: hypothetical protein                                                            | 454409..455560   |
|                | putative type III effector protein SipD                                                      | 455604..456953   |
|                | Invasion protein iagA                                                                        | 457156..458853   |
|                | adherence and invasion outer membrane protein<br>(Inv,enhances Peyer's patches colonization) | 458905..468870   |
| <b>AU</b>      | hypothetical protein                                                                         | 530110..532518   |
|                | hypothetical protein                                                                         | 532819..533274   |
|                | hypothetical protein                                                                         | 533279..534016   |
| <b>BC</b>      | Transposase InsG for insertion sequence element IS4                                          | 713785..715113   |
| <b>BL</b>      | no annotation                                                                                | 888670 - 894170  |
| <b>BQ</b>      | hypothetical protein                                                                         | 1137539..1138696 |
|                | hypothetical protein                                                                         | 1138729..1140222 |
| <b>BS</b>      | hypothetical protein                                                                         | 1204773..1205552 |
|                | hypothetical protein                                                                         | 1205621..1205998 |
|                | Putative superfamily I DNA helicases                                                         | 1206324..1209839 |
|                | putative restriction endonuclease                                                            | 1209902..1210957 |
|                | hypothetical protein                                                                         | 1211142..1212179 |
|                | Type I restriction-modification system,<br>DNA-methyltransferase subunit M (EC 2.1.1.72)     | 1212423..1213922 |
|                | Type I restriction-modification system,<br>DNA-methyltransferase subunit M (EC 2.1.1.72)     | 1213928..1215418 |
|                | Type I restriction-modification system,<br>specificity subunit S                             | 1215419..1216585 |
|                | Type I restriction-modification system,                                                      | 1216587..1219649 |



|                                   |                                                                                          |                  |
|-----------------------------------|------------------------------------------------------------------------------------------|------------------|
| <b>BS</b>                         | restriction subunit R (EC 3.1.21.3)                                                      |                  |
|                                   | Type I restriction-modification system,<br>DNA-methyltransferase subunit M (EC 2.1.1.72) | 1219730..1221637 |
|                                   | hypothetical protein                                                                     | 1221634..1223367 |
| <b>BV</b>                         | hypothetical protein                                                                     | 1351354..1351617 |
| <b>CB</b>                         | Mobile element protein                                                                   | 1506064..1507044 |
| <b>CE</b>                         | Transposase and inactivated derivatives                                                  | 1622296..1622793 |
| <b>CH</b>                         | Integrase                                                                                | 1637846..1639060 |
|                                   | hypothetical protein                                                                     | 1639306..1639419 |
|                                   | Transcriptional regulator, AlpA like                                                     | 1639488..1639691 |
|                                   | hypothetical protein                                                                     | 1639691..1640122 |
|                                   | AntA/AntB antirepressor domain protein                                                   | 1640135..1640968 |
|                                   | hypothetical protein                                                                     | 1640961..1641143 |
|                                   | Phage terminase, small subunit                                                           | 1641281..1641397 |
|                                   | Fructokinase (EC 2.7.1.4)                                                                | 1641799..1641993 |
|                                   | FIG01068751: hypothetical protein                                                        | 1641986..1642204 |
|                                   | FIG00641311: hypothetical protein                                                        | 1642197..1642391 |
|                                   | FIG00643307: hypothetical protein                                                        | 1642388..1642651 |
|                                   | hypothetical protein                                                                     | 1642648..1642869 |
|                                   | FIG00641080: hypothetical protein                                                        | 1642862..1643464 |
|                                   | hypothetical protein                                                                     | 1643475..1643816 |
|                                   | FIG00640442: hypothetical protein                                                        | 1643809..1644180 |
|                                   | DNA primase, phage associated                                                            | 1644167..1646923 |
|                                   | FIG00642382: hypothetical protein                                                        | 1647212..1647325 |
|                                   | FIG00641614: hypothetical protein                                                        | 1647508..1647669 |
|                                   | hypothetical protein                                                                     | 1647686..1648147 |
|                                   | Phage DNA transfer protein                                                               | 1648141..1648818 |
|                                   | Phage DNA transfer protein                                                               | 1648818..1650239 |
|                                   | Phage DNA transfer protein                                                               | 1650239..1652344 |
|                                   | hypothetical protein                                                                     | 1652363..1652752 |
|                                   | hypothetical protein                                                                     | 1652853..1653035 |
|                                   | Abortive infection bacteriophage resistance protein                                      | 1653588..1654550 |
|                                   | hypothetical protein                                                                     | 1654552..1655007 |
|                                   | hypothetical protein                                                                     | 1655267..1655554 |
| hypothetical protein              | 1655554..1655664                                                                         |                  |
| FIG00639659: hypothetical protein | 1656156..1656290                                                                         |                  |
| <b>CO</b>                         | Mobile element protein                                                                   | 1793431..1793619 |
|                                   | hypothetical protein                                                                     | 1793808..1793987 |
|                                   | Putative transposase InsQ for insertion<br>sequence element IS609                        | 1794025..1795173 |
| <b>CQ</b>                         | Toxin HigB                                                                               | 1873948..1874250 |
| <b>CS</b>                         | hypothetical protein                                                                     | 2029119..2029208 |
| <b>CY</b>                         | Putative inner membrane protein                                                          | 2252196..2252312 |
|                                   | Mobile element protein                                                                   | 2252410..2253390 |
| <b>DB</b>                         | Mobile element protein                                                                   | 2314265..2315290 |

|                           |                                                                                       |                  |
|---------------------------|---------------------------------------------------------------------------------------|------------------|
| <b>DF</b>                 | orf; Unknown function                                                                 | 2401963..2402109 |
|                           | orf; Unknown function                                                                 | 2402291..2402437 |
|                           | orf; Unknown function                                                                 | 2402619..2402765 |
| <b>DH</b>                 | N-acetyl-alpha-D-glucosaminyl-diphospho-ditrans, octacis-undecaprenol 4-epimerase     | 2442276..2443271 |
| <b>DI</b>                 | hypothetical protein                                                                  | 2444780..2446015 |
|                           | Glycosyl transferase, group 2 family protein                                          | 2446024..2446749 |
|                           | hypothetical protein                                                                  | 2446746..2447981 |
|                           | hypothetical protein                                                                  | 2447983..2449050 |
|                           | UDP-glucose 4-epimerase                                                               | 2449071..2450087 |
|                           | Mannosyltransferase                                                                   | 2450156..2451163 |
|                           | GDP-mannose 4,6-dehydratase                                                           | 2451174..2452295 |
|                           | GDP-L-fucose synthetase                                                               | 2452299..2453264 |
|                           | GDP-mannose mannosyl hydrolase                                                        | 2453267..2453722 |
|                           | Mannose-1-phosphate guanylyltransferase (EC 2.7.7.13) / Mannose-6-phosphate isomerase | 2453734..2455119 |
|                           | Colanic acid biosynthesis glycosyl transferase WcaE                                   | 2455203..2455949 |
|                           | Phosphomannomutase (EC 5.4.2.8) => Colanic acid                                       | 2455974..2457344 |
|                           | FIG00639501: hypothetical protein                                                     | 2469038..2469166 |
| <b>DJ</b>                 |                                                                                       |                  |
| <b>DK</b>                 | Antirestriction protein klcA                                                          | 2482161..2482640 |
|                           | UPF0380 proteins YafZ and homologs                                                    | 2482722..2483543 |
|                           | hypothetical protein                                                                  | 2483633..2483767 |
|                           | hypothetical protein                                                                  | 2483764..2484174 |
|                           | hypothetical protein                                                                  | 2484190..2484873 |
|                           | Patatin                                                                               | 2485009..2486079 |
|                           | Uncharacterized protein YjcZ paralog                                                  | 2486076..2486981 |
|                           | Clamp-binding protein paralog                                                         | 2486978..2489374 |
|                           | hypothetical protein                                                                  | 2490548..2491699 |
|                           | hypothetical protein                                                                  | 2491727..2491873 |
|                           |                                                                                       |                  |
|                           | Mobile element protein                                                                | 2493627..2494148 |
|                           | Putative transposase InsK for insertion sequence element IS150                        | 2494145..2494996 |
|                           | hypothetical protein                                                                  | 2495539..2496141 |
|                           | hypothetical protein                                                                  | 2496235..2496441 |
|                           | FIG00639191: hypothetical protein                                                     | 2498836..2499036 |
|                           | hypothetical protein                                                                  | 2499236..2499805 |
|                           | hypothetical protein                                                                  | 2500065..2500466 |
|                           | FIG00638721: hypothetical protein                                                     | 2500454..2500861 |
|                           | Transposase                                                                           | 2501667..2502524 |
|                           | Gamma-glutamyltranspeptidase (EC 2.3.2.2)<br>Glutathione hydrolase (EC 3.4.19.13)     | 2502859..2503026 |
|                           | Gamma-glutamyltranspeptidase (EC 2.3.2.2)<br>Glutathione hydrolase (EC 3.4.19.13)     | 2503017..2503130 |
| Puative phophotriesterase | 2503170..2504204                                                                      |                  |

|                                                            |                                                                |                  |
|------------------------------------------------------------|----------------------------------------------------------------|------------------|
| <b>DK</b>                                                  | Putative inner membrane protein                                | 2504207..2505172 |
|                                                            | hypothetical protein                                           | 2505229..2505987 |
|                                                            | Putative ribokinase                                            | 2506001..2507215 |
|                                                            | Transposase                                                    | 2507411..2507527 |
|                                                            | FIG00640053: hypothetical protein                              | 2507634..2507771 |
|                                                            | Aspartate ammonia-lyase                                        | 2508759..2510159 |
|                                                            | Anaerobic C4-dicarboxylate transporter                         | 2510382..2511680 |
|                                                            | Aspartate racemase                                             | 2511739..2512458 |
|                                                            | LysR-family transcriptional regulator YjiE                     | 2512798..2513697 |
|                                                            | hypothetical protein                                           | 2513967..2514101 |
|                                                            | Transposase, IS200 family                                      | 2514612..2514731 |
|                                                            | D-galactonate transporter                                      | 2515050..2516342 |
|                                                            | Galactonate dehydratase                                        | 2516462..2517610 |
|                                                            | 2-dehydro-3-deoxyphosphogalactonate aldolase                   | 2517607..2518224 |
|                                                            | 2-dehydro-3-deoxygalactonokinase                               | 2518208..2519086 |
|                                                            | D-Galactonate repressor DgoR                                   | 2519083..2519772 |
|                                                            | Mobile element protein                                         | 2520125..2520457 |
|                                                            | hypothetical protein                                           | 2520571..2520741 |
|                                                            | Transposase InsN for insertion sequence element IS911          | 2521004..2521315 |
|                                                            | Transposase InsO for insertion sequence element IS911          | 2521504..2522181 |
|                                                            | hypothetical protein                                           | 2522401..2522535 |
|                                                            | Insertion element IS401 (Burkholderia multivorans) transposase | 2522617..2522838 |
|                                                            | hypothetical protein                                           | 2523219..2523356 |
|                                                            | Uncharacterized MFS-type transporter                           | 2523787..2525181 |
|                                                            | Transcriptional regulator CKO_02662, LacI family               | 2525286..2526317 |
|                                                            | Inosine-uridine preferring nucleoside hydrolase                | 2526277..2527311 |
|                                                            | Mg(2+)-transport-ATPase-associated protein MgtC                | 2527375..2528088 |
|                                                            | Mobile element protein                                         | 2528245..2528844 |
|                                                            | Transposase                                                    | 2528899..2529792 |
|                                                            | Transposase                                                    | 2529840..2530382 |
|                                                            | Transposase                                                    | 2530379..2530657 |
|                                                            | hypothetical protein                                           | 2531103..2531381 |
|                                                            | Isoaspartyl aminopeptidase                                     | 2531719..2532750 |
|                                                            | hypothetical protein                                           | 2533077..2533226 |
|                                                            | Retron-type RNA-directed DNA polymerase                        | 2533274..2533720 |
|                                                            | hypothetical protein                                           | 2534082..2534216 |
|                                                            | Anaerobic C4-dicarboxylate transporter DcuC                    | 2534385..2535746 |
|                                                            | Tripeptide aminopeptidase                                      | 2535743..2536999 |
|                                                            | Aspartate ammonia-lyase                                        | 2537865..2539265 |
|                                                            | Anaerobic C4-dicarboxylate transporter DcuA                    | 2539421..2540755 |
|                                                            | L-asparaginase                                                 | 2541243..2542289 |
| hypothetical protein                                       | 2542619..2542744                                               |                  |
| Fumarate respiration two-component response regulator DcuR | 2542883..2543608                                               |                  |

|           |                                                                                                                                                 |                        |
|-----------|-------------------------------------------------------------------------------------------------------------------------------------------------|------------------------|
| <b>DK</b> | regulatory protein GntR, HTH:GntR-like                                                                                                          | 2544587..2545243       |
|           | Anaerobic C4-dicarboxylate transporter                                                                                                          | 2545398..2546714       |
|           | Anaerobic C4-dicarboxylate transporter DcuB                                                                                                     | 2546830..2548146       |
|           | Argininosuccinate lyase                                                                                                                         | 2548211..2549587       |
|           | Polyketide synthase modules and related proteins                                                                                                | 2550246..2550635       |
|           | hypothetical protein                                                                                                                            | 2550897..2551031       |
|           | Co-activator of prophage gene expression IbrA                                                                                                   | 2551021..2552253       |
|           | Co-activator of prophage gene expression IbrB                                                                                                   | 2552238..2552882       |
|           | hypothetical protein                                                                                                                            | 2553137..2553253       |
|           | Colicin I receptor                                                                                                                              | 2553253..2555400       |
| <b>DL</b> | Invasin                                                                                                                                         | 2572779..2573528       |
|           | iron aquisition outermembrane yersiniabactin receptor (FyuA,Psn,pesticin receptor), Outer membrane receptor for ferric siderophore              | 2574179..2576200       |
|           | iron aquisition 2,3-dihydroxybenzoate-AMP ligase (EC 2.7.7.58,Irp5) 2,3-dihydroxybenzoate-AMP ligase (EC 2.7.7.58) of siderophore biosynthesis  | 2576331..2577908       |
|           | Iron aquisition yersiniabactin synthesis enzyme YbtT Thioesterase in siderophore biosynthesis gene cluster                                      | 2577912..2578715       |
|           | Yersiniabactin synthetase, thiazolanyl reductase component Irp3, Thiazolanyl imide reductase in siderophore biosynthesis gene cluster           | 2578712..2579812       |
|           | iron aquisition yersiniabactin synthesis enzyme (Irp1,polyketide synthetase), Siderophore biosynthesis non-ribosomal peptide synthetase modules | 2579809..2589300       |
|           | iron aquisition yersiniabactin synthesis enzyme (Irp2) Siderophore biosynthesis non-ribosomal peptide synthetase modules                        | 2589388..2595495       |
|           | iron aquisition regulator (YbtA,AraC-like,required for transcription of FyuA/psn,Irp2)                                                          | 2595686..2596645       |
|           | Iron siderophore ABC transporter, permease/ATP-binding protein YbtP                                                                             | 2596812..2598614       |
|           | Iron siderophore ABC transporter, permease/ATP-binding protein YbtQ                                                                             | 2598601..2600403       |
|           | Putative signal transducer                                                                                                                      | 2600396..2601676       |
|           | Salicylate synthetase (EC 5.4.4.2)(EC 4.2.99.21) Salicylate synthetase (EC 5.4.4.2)(EC 4.2.99.21) of siderophore biosynthesis                   | 2601704..2603008       |
|           | Integrase                                                                                                                                       | 2603202..2604245       |
|           | <b>DM</b>                                                                                                                                       | Mobile element protein |
| <b>DN</b> | 2-oxoglutarate/malate translocator                                                                                                              | 2860920..2862320       |
|           | D-3-phosphoglycerate dehydrogenase                                                                                                              | 2862356..2863315       |
|           | probable beta-D-galactosidase                                                                                                                   | 2863326..2863805       |

|                                                |                                                                |                  |
|------------------------------------------------|----------------------------------------------------------------|------------------|
| <b>DN</b>                                      | L-fuco-beta-pyranose dehydrogenase                             | 2863818..2864561 |
| <b>DU</b>                                      | Mobile element protein                                         | 3135549..3136529 |
| <b>DW</b>                                      | Mobile element protein                                         | 3176170..3176691 |
|                                                | Putative transposase InsK for insertion sequence element IS150 | 3176688..3177539 |
| <b>DX</b>                                      | regulatory protein for 2-phenylethylamine catabolism           | 3196463..3196654 |
| <b>EA</b>                                      | Transposase InsG for insertion sequence element IS4            | 3328295..3329623 |
| <b>EB</b>                                      | Small inner membrane protein, YmgF family                      | 3353580..3353714 |
| <b>EC</b>                                      | FIG00641724: hypothetical protein                              | 3367370..3367600 |
| <b>EF</b>                                      | Transposase InsN for insertion sequence element IS911          | 3404823..3405134 |
|                                                | Transposase InsO for insertion sequence element IS911          | 3405323..3406000 |
| <b>EH</b>                                      | Mobile element protein                                         | 3687986..3689011 |
| <b>EN</b>                                      | Phage integrase, Phage P4-associated                           | 3973432..3974622 |
|                                                | hypothetical protein                                           | 3974942..3975055 |
|                                                | hypothetical protein                                           | 3975890..3976045 |
|                                                | Transposase InsF for insertion sequence IS3                    | 3976042..3976473 |
|                                                | Transposase InsF for insertion sequence IS3                    | 3976505..3976885 |
|                                                | Transposase InsE for insertion sequence IS3E                   | 3976882..3977181 |
|                                                | hypothetical protein                                           | 3977358..3979718 |
|                                                | hypothetical protein                                           | 3980362..3981378 |
|                                                | ATP-dependent helicase                                         | 3981860..3984058 |
|                                                | ATP/GTP-binding protein                                        | 3984055..3985371 |
|                                                | probable membrane protein YPO2297                              | 3985375..3987684 |
|                                                | hypothetical protein                                           | 3988153..3988311 |
|                                                | hypothetical protein                                           | 3988319..3988438 |
|                                                | hypothetical protein                                           | 3988486..3988725 |
|                                                | Mobile element protein                                         | 3988920..3989213 |
|                                                | Mobile element protein                                         | 3989524..3989670 |
|                                                | Putative transport protein                                     | 3989959..3991248 |
|                                                | Oxidoreductase, zinc-binding dehydrogenase family (EC 1.1.1.-) | 3991220..3992245 |
|                                                | hypothetical protein                                           | 3992493..3992636 |
|                                                | Transposase                                                    | 3992801..3993607 |
|                                                | Insertion element IS600 ( <i>Shigella sonnei</i> ) transposase | 3993643..3993945 |
|                                                | hypothetical protein                                           | 3994335..3994457 |
|                                                | hypothetical protein                                           | 3994515..3994652 |
|                                                | Transposase                                                    | 3994805..3995287 |
|                                                | Transposase                                                    | 3995284..3995472 |
|                                                | Mobile element protein                                         | 3995772..3996512 |
|                                                | hypothetical protein                                           | 3996519..3997448 |
|                                                | Mobile element protein                                         | 3997523..3997861 |
|                                                | hypothetical protein                                           | 3997855..3998142 |
|                                                | hypothetical protein                                           | 3998234..3998347 |
| Putative Heme-regulated two-component response | 3998826..3999260                                               |                  |



|           |                                                                                             |                  |
|-----------|---------------------------------------------------------------------------------------------|------------------|
| <b>EN</b> | regulator                                                                                   |                  |
|           | Transcriptional regulator STM1541, GntR family                                              | 3999308..3999979 |
|           | Mobile element protein                                                                      | 4000193..4000447 |
|           | Mobile element protein                                                                      | 4000398..4000976 |
|           | Transposase InsO for insertion sequence element IS911                                       | 4001034..4001711 |
|           | Transposase InsN for insertion sequence element IS911                                       | 4001900..4002211 |
|           | Uncharacterized protein YeeT                                                                | 4002273..4002452 |
|           | YeeU protein (antitoxin to YeeV)                                                            | 4002736..4002936 |
|           | FIG00639775: hypothetical protein                                                           | 4003474..4003992 |
|           | hypothetical protein                                                                        | 4004052..4011971 |
|           | hypothetical protein                                                                        | 4011996..4012616 |
|           | Type 1 fimbriae regulatory protein, FimB/FimE family                                        | 4012934..4013563 |
| <b>EO</b> | Putative transposase InsQ for insertion sequence element IS609                              | 4056484..4056906 |
|           | Putative transposase InsQ for insertion sequence element IS609                              | 4057045..4057290 |
|           | Putative transposase InsQ for insertion sequence element IS609                              | 4057372..4057632 |
|           | hypothetical protein                                                                        | 4057670..4057849 |
|           | Mobile element protein                                                                      | 4058038..4058241 |
| <b>EQ</b> | Transposase InsG for insertion sequence element IS4                                         | 4317727..4319055 |
| <b>EZ</b> | Predicted regulator of STY3230 transporter operon                                           | 4624531..4624962 |
|           | Substrate-specific component STY3230 of queuosine-regulated ECF transporter                 | 4624985..4625563 |
|           | Transmembrane component STY3231 of energizing module of queuosine-regulated ECF transporter | 4625564..4626271 |
|           | ATPase component STY3232 of energizing module of queuosine-regulated ECF transporter        | 4626259..4626936 |
|           | ATPase component STY3233 of energizing module of queuosine-regulated ECF transporter        | 4626930..4627607 |
| <b>FA</b> | hypothetical protein                                                                        | 4645977..4646708 |
| <b>FB</b> | FIG00640004: hypothetical protein                                                           | 4741484..4741609 |
|           | D-arabinose-5-phosphate isomerase (EC 5.3.1.13)                                             | 4742127..4743110 |
|           | Capsular polysaccharide export system inner membrane protein KpsE                           | 4743182..4744330 |
|           | Capsular polysaccharide export system periplasmic protein KpsD                              | 4744354..4746030 |
|           | 3-deoxy-manno-octulosonate cytidyltransferase                                               | 4746040..4746780 |
|           | Capsular polysaccharide export system protein KpsC                                          | 4746777..4748804 |
|           | Capsular polysaccharide export system protein KpsS                                          | 4748839..4750080 |
|           | Capsular polysaccharide ABC transporter, ATP-binding protein KpsT                           | 4760607..4761299 |
|           | Capsular polysaccharide ABC transporter,                                                    | 4761296..4762072 |

|           |                                                                                       |                  |
|-----------|---------------------------------------------------------------------------------------|------------------|
| <b>FB</b> | permease protein KpsM                                                                 |                  |
| <b>FD</b> | AMP-binding enzyme, associated with serine palmitoyltransferase                       | 4791023..4792744 |
|           | Nucleoside-diphosphate-sugar epimerase                                                | 4792741..4793655 |
|           | Acyl carrier protein Acyl carrier protein associated with serine palmitoyltransferase | 4793687..4793935 |
|           | Serine palmitoyltransferase                                                           | 4793935..4795107 |
|           | Permease, YjgP/YjgQ family                                                            | 4795142..4796221 |
|           | Permease Ygh-P1, YjgP/YjgQ family                                                     | 4796218..4797288 |
|           | Transcriptional regulator, YtfJ-family                                                | 4797319..4797879 |
|           | Conserved hypothetical TPR repeat protein, clustered with yghQ                        | 4797891..4798715 |
| <b>FE</b> | hypothetical protein                                                                  | 4826337..4827254 |
|           | hypothetical protein                                                                  | 4827436..4827783 |
| <b>FF</b> | Transcriptional regulator STM3084, GntR family                                        | 4830325..4831074 |
|           | D-mannonate oxidoreductase                                                            | 4831397..4832869 |
|           | L-galactonate-5-dehydrogenase                                                         | 4832866..4833882 |
|           | Malate dehydrogenase                                                                  | 4833893..4834903 |
|           | TRAP-type C4-dicarboxylate transport system, periplasmic component                    | 4834976..4835959 |
|           | TRAP-type C4-dicarboxylate transport system, small permease component                 | 4836000..4836482 |
|           | TRAP-type C4-dicarboxylate transport system, large permease component                 | 4836493..4837797 |
| <b>FG</b> | hypothetical phosphosugar isomerases                                                  | 4848603..4849490 |
|           | ABC transporter, substrate-binding protein (cluster 8, B12/iron complex)              | 4849487..4850434 |
|           | Iron compound ABC transporter, permease protein                                       | 4850445..4851494 |
|           | Iron compound ABC transporter, permease protein                                       | 4851491..4852474 |
|           | Iron compound ABC transporter, ATP-binding protein                                    | 4852471..4853280 |
|           | Putative iron compound receptor                                                       | 4853654..4855795 |
| <b>FH</b> | Putative arylsulfate sulfotransferase                                                 | 4864421..4866217 |
|           | Periplasmic thiol:disulfide interchange protein, DsbA-like                            | 4866235..4866903 |
|           | Inner membrane thiol:disulfide oxidoreductase, DsbB-like"                             | 4866918..4867589 |
